# Supplementary material for: Spatio-Temporal Comprehensive Measurements of Chinese Citizens’ Health Levels and Associated Influencing Factors
Source: Healthcare (Basel). 2020 Jul 25;8(3):231. doi: 10.3390/healthcare8030231 (PMC7551958; doi:10.3390/healthcare8030231)
Supplement: Supplementary file 1 [file healthcare-08-00231-s001.xlsx]

## Sheet: citizens’ health levels
Table S1-1. The original data of measurement of citizens’ health levels in 2002
The criteria layer	Health status						Health environment				Health services and guarantees
The index layer	Life expectancy per capita	Population mortality	Maternal mortality rate	Perinatal mortality	Statutory reporting of the incidence of infectious diseases in category A & B	Health literacy levels of citizens	Safe water popularizing rate	Rural sanitary toilet popularizing rate	The number of days when the air quality reaches or is better than type II	Landscaping ratio	Hospitals per 10,000 people	Health technicians per 1,000 people	Number of beds in medical and health institutions per 1,000 people	Total health expenditure as a percentage of GDP
Unit	year	‰	1/100000	‰	1/100000	%	%	%	day	%	pcs	person	pcs	%
Beijing	78.63	5.7	18.3	7.11	229.16	4.7	100	70.2	203	36.03	0.32	9.58	6.31	6.08
Tianjin	77.18	6.04	11.5	8.06	195.18	2.8	100	27.4	274	32.63	0.26	6.59	4.12	4.62
Hebei	72.7	6.25	31.9	11.2	146.03	2.73	99.91	37.9	222	32.88	0.12	3.21	2.22	3.59
Shanxi	71.9	6.14	49.3	12.45	115.33	1.11	79.58	38.1	130	21.9	0.25	4.36	3.07	4.69
Inner Mongolia	70.3	5.92	47.7	18.32	168.83	3.72	81.73	33.3	240	25.48	0.19	4.31	2.58	3.23
Liaoning	69.5	6.04	23.4	11.36	193.24	2.34	90.62	48.8	268	33.49	0.22	4.99	3.79	3.5
Jilin	71.91	5.11	40.6	10.64	171.23	3.05	68.9	55.6	240	28.34	0.22	4.85	3.01	3.95
Heilongjiang	72.4	5.44	22.4	8.43	163.87	1.6	79.65	50.3	295	26.42	0.22	4.15	2.99	4.03
Shanghai	79.52	5.95	10	4.07	201.9	3.2	100	92.7	317	21.76	0.13	7.6	5.58	3.84
Jiangsu	74.5	6.99	25.4	7.88	130.79	3	90.11	42.4	260	34.02	0.12	3.37	2.3	3.09
Zhejiang	74.7	6.19	12.8	8.82	271.89	5.5	98.37	71.1	280	28.16	0.11	3.62	2.43	3.36
Anhui	71.91	5.17	31.9	13.81	148.76	1	87.44	49.5	310	23.29	0.1	2.38	1.75	4.19
Fujian	72.9	5.57	31	13.31	178.6	2.5	93.01	48.3	303	32.93	0.1	3.21	2.03	3.55
Jiangxi	70.63	6.02	41.1	12.72	171.31	2.8	90.86	54.2	210	27.63	0.13	2.77	1.9	3.2
Shandong	74.4	6.62	22.5	9.39	91.24	5.76	62.83	63.1	278	35.73	0.12	3.37	2.25	3.44
Henan	72	6.38	54.1	12.98	168.86	2.1	84.01	55.9	250	28.48	0.11	2.73	1.93	4.39
Hubei	73.1	6.17	34.8	9.14	171.02	5.3	59.89	58.2	294	31.85	0.1	3.51	2.06	3.37
Hunan	71.6	6.7	46.8	13.84	112	4.6	82.82	51.4	221	28.61	0.1	3.16	1.94	5.09
Guangdong	74.79	5.08	19.7	10.9	111.59	3.88	88.48	42.7	343	24.79	0.11	3.44	2.15	3.31
Guangxi	71.5	6.3	54	14.39	203.19	3.6	70.39	70	259	30.77	0.09	2.54	1.71	4.28
Hainan	73.9	5.72	28.6	13.68	176.23	3.6	82.7	49.4	350	39.67	0.24	3.75	2.22	3.5
Chongqing	73.2	6.08	65.4	11.84	208.66	3	68.18	32.1	220	20.01	0.11	2.56	1.87	4.46
Sichuan	72.2	6.55	74.3	9.58	337.62	2.9	92.07	36.2	255	25.28	0.13	2.88	2.06	4.4
Guizhou	67.6	7.21	111.4	15.05	175.4	0.6	89.58	18.2	100	27.39	0.1	2.06	1.5	6.7
Yunnan	66.6	7.3	73.6	17.22	278.85	0.5	74.27	42.3	264	23.93	0.13	2.65	2.16	6.35
Tibet	64.75	6.07	401.4	20.33	221.99	0.16	61.81	0.1	355	0.7	0.37	3.23	2.24	3.18
Shannxi	71	6.36	52.2	15.23	221	4.21	92.39	38	265	25.06	0.22	3.75	2.56	3.88
Gansu	69.5	6.45	87.3	20.7	348.8	1.5	81.43	41.9	210	18.99	0.14	3.16	2.24	5.38
Qinghai	67	6.35	130.9	24.82	320.49	1.6	99.88	57	251	17.77	0.26	4.13	3.07	4.42
Ningxia	71.3	4.86	76.6	17.04	315.46	3.7	45.71	22.3	260	8.41	0.18	3.73	2.27	6.01
Xinjiang	68.6	5.43	160.3	16.15	263.48	0.2	96.76	33.8	212	32.64	0.33	4.85	3.49	4.75
Table S1-2. The original data of measurement of citizens’ health levels in 2003
The criteria layer	Health status						Health environment				Health services and guarantees
The index layer	Life expectancy per capita	Population mortality	Maternal mortality rate	Perinatal mortality	Statutory reporting of the incidence of infectious diseases in category A & B	Health literacy levels of citizens	Safe water popularizing rate	Rural sanitary toilet popularizing rate	The number of days when the air quality reaches or is better than type II	Landscaping ratio	Hospitals per 10,000 people	Health technicians per 1,000 people	Number of beds in medical and health institutions per 1,000 people	Total health expenditure as a percentage of GDP
Unit	year	‰	1/100000	‰	1/100000	%	%	%	day	%	pcs	person	pcs	%
Beijing	79.62	5.2	18	7.28	231.49	5.7	100	73	224	38.13	0.31	9.71	6.14	6.27
Tianjin	77.5	6.04	11	6.81	196.96	3.8	100	36.9	264	34.02	0.27	6.52	4.08	4.56
Hebei	72.8	6.27	31.3	11.01	158.9	2.96	99.92	39.5	240	33.64	0.11	3.2	2.21	3.9
Shanxi	72.3	6.04	48.2	11.59	112.96	1.41	84.28	41.7	136	24.89	0.25	4.4	3.02	4.49
Inner Mongolia	70.54	6.17	39.3	16.65	165.07	4.02	83.4	35.5	255	23.96	0.19	4.31	2.58	3.18
Liaoning	70.4	5.83	27.5	10.99	162.44	2.74	91.46	49	298	34.64	0.22	5.06	3.8	3.5
Jilin	72.5	5.64	40.1	9.98	184.15	3.35	74.85	56.1	246	29.51	0.22	4.84	3.04	3.29
Heilongjiang	72.5	5.45	21.9	7.92	189.65	2.2	80.87	52.6	298	25.94	0.22	4.03	2.93	3.94
Shanghai	79.8	6.2	6.9	3.87	219.93	3.7	100	92.8	325	22.27	0.13	7.62	5.57	3.98
Jiangsu	74.7	7.03	21.6	8.21	138.23	3.5	92.39	45.9	269	35.98	0.12	3.39	2.36	3.44
Zhejiang	74.8	6.38	18.9	8.34	288.75	6	98.61	73.6	274	30.06	0.1	3.8	2.58	3.64
Anhui	72.5	5.2	31.8	11.94	155.49	1	88.01	50.9	318	23.97	0.1	2.38	1.75	4.3
Fujian	73.2	5.58	36.1	11.97	217.83	3	95.79	51.9	305	34.11	0.1	2.89	2.09	3.31
Jiangxi	71.17	5.98	37.5	12.47	206.83	3	91.26	57.1	222	29.24	0.12	2.67	1.79	3.76
Shandong	74.6	6.64	21.9	9.09	100.88	6.16	64.76	64.8	289	36.13	0.11	3.38	2.22	3.31
Henan	72.4	6.46	50.3	11.64	190.01	2.4	83.81	59.8	254	29.93	0.11	2.85	1.97	4.74
Hubei	73.2	5.94	39.9	8.13	220.87	5.7	63.76	60.8	286.5	32.54	0.1	3.46	2.13	3.6
Hunan	72	6.87	44.9	13.01	144.49	5.6	86.32	54.3	226	30.87	0.11	3.21	2.03	4.89
Guangdong	74.9	5.31	22.7	9.9	111.4	4.18	92.14	73.1	347	27.36	0.11	3.54	2.23	3.64
Guangxi	71.9	6.57	43.1	13.65	246.31	4	73.93	45.5	261	29.78	0.09	2.45	1.7	4.56
Hainan	74.2	5.52	42.2	12.76	225.06	3.8	84.03	51.3	362	35.56	0.24	3.68	2.15	3.85
Chongqing	73.9	7.2	64.3	9.73	223.6	3.06	70.75	37.9	237	20.66	0.12	2.47	1.91	4.75
Sichuan	72.7	6.06	73.5	10.5	380.05	3.01	92.8	33.5	260	26.04	0.13	2.82	2.07	4.79
Guizhou	67.8	6.87	89.1	16.41	221.04	0.9	93.73	21.5	152	26.97	0.1	2.05	1.48	6.32
Yunnan	67.1	7.2	68.8	23.53	294.55	1.1	74.84	46	307	23.97	0.13	2.69	2.15	6.37
Tibet	64.71	6.3	295.9	17.87	254.28	0.18	54.62	0.1	356	0.7	0.36	3.2	2.26	3.47
Shannxi	71.5	6.38	53	15.32	277.51	4.31	93.2	32.8	270	25.92	0.22	3.7	2.63	4.93
Gansu	69.7	6.46	88.3	19.57	382.64	1.7	82.22	44.4	220	21.54	0.15	3.19	2.21	5.69
Qinghai	67.5	6.09	115.6	23.37	350.11	1.7	99.94	57.6	258	19.73	0.25	4.03	3.05	4.95
Ningxia	71.4	4.73	49.2	15.7	467.53	3.8	47.5	26.5	275	13.01	0.21	3.99	2.55	6.11
Xinjiang	69.1	5.23	122.3	18.3	261.52	0.4	97.5	33.8	243	32.67	0.32	5.07	3.69	4.82
Table S1-3. The original data of measurement of citizens’ health levels in 2004
The criteria layer	Health status						Health environment				Health services and guarantees
The index layer	Life expectancy per capita	Population mortality	Maternal mortality rate	Perinatal mortality	Statutory reporting of the incidence of infectious diseases in category A & B	Health literacy levels of citizens	Safe water popularizing rate	Rural sanitary toilet popularizing rate	The number of days when the air quality reaches or is better than type II	Landscaping ratio	Hospitals per 10,000 people	Health technicians per 1,000 people	Number of beds in medical and health institutions per 1,000 people	Total health expenditure as a percentage of GDP
Unit	year	‰	1/100000	‰	1/100000	%	%	%	day	%	pcs	person	pcs	%
Beijing	79.87	5.4	17.3	6.95	408.03	6.7	100	76.3	229	40.2	0.34	9.99	6.3	5.92
Tianjin	77.9	5.97	10.5	6.74	261.26	4.8	100	52.5	299	35.01	0.27	6.45	4.14	4.18
Hebei	72.9	6.19	28.3	10.59	192.1	3.19	99.94	42.6	273	34.28	0.12	3.28	2.16	3.86
Shanxi	71.97	6.11	45.2	12.39	192.16	1.61	85.62	45.2	169	27.22	0.26	4.48	3.11	4.18
Inner Mongolia	70.8	5.98	36.3	15.49	256.02	4.32	82.21	35.7	265	24.83	0.2	4.31	2.59	3.07
Liaoning	71.24	5.6	24.5	11.1	206.31	3.24	92.99	50.7	305	35.4	0.22	5.1	3.85	4.02
Jilin	72.97	5.63	37.1	9.7	220.48	3.55	77.25	58.7	258	30.22	0.22	4.84	3.05	4.06
Heilongjiang	72.5	5.45	18.9	6.93	275.56	2.7	80.77	54.3	301	26.85	0.23	3.97	2.98	4.02
Shanghai	80.29	6	3.9	3.27	357.76	4	100	94.1	311	27.29	0.14	7.52	5.62	3.91
Jiangsu	75	7.2	18.6	7.19	202.46	4	94	50.2	288	37.89	0.13	3.47	2.46	3.29
Zhejiang	74.9	5.76	15.9	7.96	407.33	6.5	98.86	75.9	308	31.88	0.11	4.05	2.74	3.93
Anhui	72.97	5.5	28.8	9.68	180.16	1.2	89.95	52.6	330	26.84	0.1	2.45	1.78	4.12
Fujian	73.6	5.62	33.1	10.92	268.16	3.5	95.9	55.6	336	34.93	0.1	2.98	2.17	3.17
Jiangxi	71.71	5.99	34.5	10.31	258.56	3.2	92.24	59.3	232	31.01	0.12	2.71	1.79	3.5
Shandong	74.8	6.49	18.9	7.79	128.87	6.56	75.46	66.6	286	36.57	0.12	3.5	2.35	2.99
Henan	72.9	6.47	47.3	11.05	239.33	2.7	92.14	60.2	276	30.88	0.12	2.87	1.99	4.35
Hubei	73.4	6.03	36.9	7.91	254.21	6.1	73.75	62.5	294	34.06	0.09	3.56	2.14	3.85
Hunan	72.38	6.8	41.9	12.41	130.24	6.6	87.61	56.4	212	32.16	0.11	3.15	2.07	4.81
Guangdong	75.01	5.12	19.7	9.33	205.06	4.38	95.14	48	341	30.89	0.11	3.63	2.35	3.43
Guangxi	72.6	6.12	40.1	12.86	300.3	4.36	78.74	75.1	263	30.81	0.09	2.57	1.75	4.15
Hainan	74.5	5.79	39.2	12.57	404.54	4	89.64	53	360	36.66	0.24	3.71	2.14	4.01
Chongqing	74.6	6.6	63	10.54	265.91	3.13	76.81	35.9	243	21.59	0.12	2.47	1.93	4.74
Sichuan	73.2	6.27	70.5	9.61	318.87	3	97.49	39	265	28.54	0.13	2.75	2.11	4.64
Guizhou	68	6.35	86.1	16.54	322.91	1.2	88.6	24.7	122	27.78	0.1	2	1.52	5.8
Yunnan	67.6	6.6	65.8	15.81	216.29	1.9	81.5	49.6	320	24.59	0.13	2.69	2.25	6.21
Tibet	64.85	6.2	292.9	18.69	239.05	0.2	69.01	0.1	355	0.7	0.35	3.27	2.26	3.67
Shannxi	72	6.33	50	14.59	388.29	4.41	94.43	33.3	278	29.35	0.22	3.66	2.62	5.32
Gansu	69.75	6.52	85.3	19.01	444.16	2	85.15	47	232	23.89	0.14	3.16	2.24	5.33
Qinghai	68	6.45	112.6	21.09	384.59	1.8	99.94	58.2	269	22.06	0.24	3.94	3.04	5.03
Ningxia	71.6	4.79	46.2	15.29	516.4	3.9	61.1	28.2	279	18.33	0.22	3.88	2.69	6.31
Xinjiang	69.7	5.09	119.3	19.02	435.31	0.6	98.12	34	222	31.77	0.35	5.18	3.84	4.55
Table S1-4. The original data of measurement of citizens’ health levels in 2005
The criteria layer	Health status						Health environment				Health services and guarantees
The index layer	Life expectancy per capita	Population mortality	Maternal mortality rate	Perinatal mortality	Statutory reporting of the incidence of infectious diseases in category A & B	Health literacy levels of citizens	Safe water popularizing rate	Rural sanitary toilet popularizing rate	The number of days when the air quality reaches or is better than type II	Landscaping ratio	Hospitals per 10,000 people	Health technicians per 1,000 people	Number of beds in medical and health institutions per 1,000 people	Total health expenditure as a percentage of GDP
Unit	year	‰	1/100000	‰	1/100000	%	%	%	day	%	pcs	person	pcs	%
Beijing	79.7	5.2	17.1	6.78	445.91	7.7	100	78.4	234	42.3	0.34	10.13	6.39	6.21
Tianjin	76.8	6.01	13.4	6.98	283.98	5.8	100	74.1	298	36.4	0.26	6.48	4.19	4.12
Hebei	73.6	6.75	25.8	9.09	198.47	3.42	99.95	44.6	295	35.04	0.12	3.35	2.24	3.34
Shanxi	73.4	6	42.7	12.42	288.24	2.11	90.32	47.3	226	30.21	0.26	4.45	3.13	4.08
Inner Mongolia	71.9	5.46	33.8	13.31	332.08	4.52	83.88	36.3	296	23.31	0.2	4.36	2.71	3.14
Liaoning	75.1	6.04	22	10.78	214.73	3.74	93.83	52.8	313	36.55	0.22	5	3.85	3.56
Jilin	74.9	5.32	34.6	9.58	232.23	3.75	83.2	60.4	263	31.39	0.21	4.71	3.08	4.77
Heilongjiang	74.1	5.2	16.4	7.09	296.95	3.2	79.55	55.8	294	26.37	0.23	4	2.99	4.35
Shanghai	80.12	6.08	1.4	2.52	275.21	4.3	99.98	96.5	322	27.8	0.14	7.61	5.76	3.92
Jiangsu	75.4	7.03	16.1	6.61	200.77	4.5	96.28	53.8	303	39.85	0.13	3.55	2.54	3.07
Zhejiang	75.9	6.08	13.4	7.41	393.74	7	99.1	82.3	331	33.78	0.11	4.31	2.85	3.63
Anhui	73	6.23	26.3	9.41	224.35	1.3	90.52	54.2	339	27.52	0.11	2.45	1.84	4.51
Fujian	74.2	5.62	30.6	10.46	279.28	4	98.68	58.3	320	36.11	0.1	2.98	2.16	3.36
Jiangxi	71	5.96	32	8.31	281.45	3.5	92.64	62	299	32.62	0.11	2.65	1.81	3.7
Shandong	75	6.31	16.4	7.69	139.09	6.96	77.39	68.1	313	36.97	0.12	3.51	2.51	2.93
Henan	73	6.3	44.8	9.81	302.82	3	91.94	61.1	301	32.33	0.12	2.89	2.02	4.34
Hubei	73	5.69	34.4	7.49	267.27	6.5	77.62	63.7	310	34.75	0.1	3.59	2.15	4.27
Hunan	72.5	6.75	39.4	11.06	169.1	7.6	91.11	57.8	183	34.42	0.12	3.18	2.12	4.17
Guangdong	74.8	4.68	17.2	9	292.04	4.58	98.8	51.1	335	33.46	0.1	3.76	2.44	3.54
Guangxi	73	6.09	37.6	12.49	306.31	4.76	82.28	75	258	29.82	0.1	2.64	1.78	3.73
Hainan	74	5.72	36.7	11.52	365.2	4.2	85.97	54.1	360	32.55	0.23	3.67	2.13	3.87
Chongqing	73	6.4	77.7	8.12	324.86	3.2	79.38	40.4	267	22.24	0.13	2.49	1.93	4.39
Sichuan	73.2	6.8	68	10.05	285.7	3.15	97.22	38.3	275	29.3	0.14	2.73	2.13	5.02
Guizhou	68	7.21	83.6	14.67	301	1.5	92.75	27.1	213	27.36	0.1	2.11	1.51	6.12
Yunnan	67	6.75	63.3	15.3	253.19	2.1	82.07	53.2	328	24.63	0.15	2.77	2.31	6.48
Tibet	66	7.15	290.4	19.04	293.65	0.22	61.82	0.1	358	0.21	0.35	3.33	2.4	3.68
Shannxi	72	6.01	47.5	12.64	328.12	4.51	93.24	34.1	287	30.21	0.22	3.69	2.69	5.7
Gansu	70	6.57	82.8	17.44	417.29	2.5	85.94	50.2	240	26.44	0.15	3.19	2.3	5.51
Qinghai	68	6.21	110.1	18.95	436.25	1.9	100	59.7	275	24.02	0.24	3.87	2.93	5.68
Ningxia	71.5	4.95	43.7	13.84	422.52	4	62.89	33.9	283	22.92	0.22	3.88	2.86	6.58
Xinjiang	70	5.04	116.8	19.97	467.96	0.8	97.86	36.2	315	31.8	0.34	4.91	3.87	4.95
Table S1-5. The original data of measurement of citizens’ health levels in 2006
The criteria layer	Health status						Health environment				Health services and guarantees
The index layer	Life expectancy per capita	Population mortality	Maternal mortality rate	Perinatal mortality	Statutory reporting of the incidence of infectious diseases in category A & B	Health literacy levels of citizens	Safe water popularizing rate	Rural sanitary toilet popularizing rate	The number of days when the air quality reaches or is better than type II	Landscaping ratio	Hospitals per 10,000 people	Health technicians per 1,000 people	Number of beds in medical and health institutions per 1,000 people	Total health expenditure as a percentage of GDP
Unit	year	‰	1/100000	‰	1/100000	%	%	%	day	%	pcs	person	pcs	%
Beijing	80.07	4.97	7.9	6.85	448.66	8.7	100	63.1	241	44.35	0.34	10.58	6.79	6.13
Tianjin	78.8	6.07	6.6	5.18	304.56	6.8	100	92.6	305	37	0.2	6.52	4.58	3.87
Hebei	73.1	6.59	23.3	8.63	225.19	3.65	92.01	44.1	299	35.57	0.13	3.37	2.49	3.17
Shanxi	73.11	5.73	39.3	10.84	258.15	2.41	89.58	44.2	246	31.88	0.27	4.47	3.36	4.41
Inner Mongolia	70.7	5.91	38.6	13.3	319.99	4.82	80.67	30	310	26.58	0.2	4.3	2.93	3.2
Liaoning	73	5.3	19.3	11.9	222.89	4.24	92.14	47.7	319	36.93	0.22	5.14	4.26	4.51
Jilin	73.59	5	30.3	8.77	227.37	4.05	80.53	64	260	31.64	0.22	4.79	3.38	4.89
Heilongjiang	73.3	5.18	27	8.39	264.98	3.7	79.2	57	301	28.67	0.24	4.01	3.25	4.28
Shanghai	80.97	5.89	9.5	2.95	237.22	5	100	95.1	324	37.33	0.14	7.97	6.81	3.8
Jiangsu	75.6	7.08	11.2	6.29	180.37	5	81.99	56.9	299	41.72	0.14	3.76	2.85	3.01
Zhejiang	75.48	5.42	10.3	7.15	355.89	7.5	70.96	79.4	274	35.53	0.12	4.64	3.2	3.55
Anhui	73.59	6.3	26.9	7.88	245.57	1.8	89.93	55.6	346	32.58	0.11	2.57	2.02	4.81
Fujian	73.7	5.75	24.6	10.07	273.6	4.5	78.37	60.8	333	36.58	0.1	3.13	2.48	3.19
Jiangxi	72.7	6.01	31.4	7.91	242.07	4	91.34	61.4	337	34.56	0.11	2.69	1.98	3.89
Shandong	75.3	6.1	15.7	7.44	129.56	7.36	97.17	71.1	335	37.45	0.13	3.63	2.78	2.94
Henan	73.5	6.27	41.2	9.14	331.09	3.3	87.16	63.6	313	32.79	0.13	2.95	2.2	4.58
Hubei	73.6	5.95	27.1	7.4	284.96	6.9	91.45	65.4	325	37.11	0.1	3.61	2.35	4.52
Hunan	73.8	6.73	34.6	9.48	191.24	8.6	90.27	54.8	235	34.74	0.13	3	2.34	4.55
Guangdong	75.23	4.49	17.3	8.65	298.21	4.78	76.6	43.8	341	37.96	0.11	4.14	2.74	3.33
Guangxi	73.4	6.1	29	11.29	325.46	5.16	79.85	75.2	260	32.88	0.1	2.69	1.95	3.5
Hainan	75.1	5.73	41	9.75	339.66	4.4	80.4	48.4	362	38.86	0.23	3.69	2.39	3.95
Chongqing	75.98	6.5	63.5	6.97	337.41	3.27	81.38	41.9	287	23.45	0.13	2.49	2.13	4.53
Sichuan	73.8	6.28	57.7	10.02	301.4	3.25	80.83	36	281	33.54	0.14	2.76	2.3	4.68
Guizhou	68.8	6.71	79.3	13.56	312.28	1.8	84.24	27.9	243	29.41	0.1	2.1	1.69	6.69
Yunnan	68.8	6.3	64	13.41	239.48	2.9	74.46	49.1	310	25.83	0.14	2.81	2.55	6.36
Tibet	65.62	5.7	244.1	24.45	256.04	0.25	48.63	0.1	358	21.41	0.35	3.31	2.79	3.84
Shannxi	73	6.15	32.9	11.49	261.66	4.61	85.66	34.8	289	36.22	0.23	3.72	2.97	3.83
Gansu	71	6.62	64.8	17.55	464.26	2.8	88.66	52.9	245	28.59	0.15	3.27	2.53	5.46
Qinghai	68.6	6.27	88.5	16.31	390.96	2	91.28	52.2	283	26.72	0.25	3.94	3.03	6.32
Ningxia	72.13	4.84	44.7	15.5	408.32	4.2	84.03	34.2	296	28.98	0.22	3.93	3.04	5.46
Xinjiang	70.9	5.03	92.1	19.77	536.12	1.1	90.5	34.3	304	29.97	0.34	5	4.17	5.05
Table S1-6. The original data of measurement of citizens’ health levels in 2007
The criteria layer	Health status						Health environment				Health services and guarantees
The index layer	Life expectancy per capita	Population mortality	Maternal mortality rate	Perinatal mortality	Statutory reporting of the incidence of infectious diseases in category A & B	Health literacy levels of citizens	Safe water popularizing rate	Rural sanitary toilet popularizing rate	The number of days when the air quality reaches or is better than type II	Landscaping ratio	Hospitals per 10,000 people	Health technicians per 1,000 people	Number of beds in medical and health institutions per 1,000 people	Total health expenditure as a percentage of GDP
Unit	year	‰	1/100000	‰	1/100000	%	%	%	day	%	pcs	person	pcs	%
Beijing	80.24	4.92	16.52	4.98	421.02	9.7	100	66.5	246	36.17	0.33	11.49	6.6	5.31
Tianjin	79.2	5.86	8.61	6.99	294.77	7.8	100	88.6	320	33.56	0.21	6.59	4.11	4.3
Hebei	73.2	6.78	20.71	8.45	206.5	3.88	100	44.4	313	36.5	0.16	3.46	2.56	3.67
Shanxi	73.26	5.97	33.89	10.76	283.91	2.61	93	45.3	305	32.58	0.28	4.28	3.03	4.43
Inner Mongolia	71.6	5.73	35.4	11.95	341.66	5.12	81.5	29.5	319	28.07	0.22	4.38	2.73	3.91
Liaoning	73.8	5.36	15.43	11.73	222.41	5.24	96.9	51.1	326	37.52	0.21	5.09	3.91	4.36
Jilin	73.93	5.05	28.49	8.77	208.09	4.15	88	64.3	265	31.25	0.21	4.67	3.31	4.68
Heilongjiang	74	5.39	21.58	8.75	254.68	4.2	81.8	58	308	28.77	0.24	4.16	3.07	4.86
Shanghai	81.08	6.03	7.86	3.24	220.67	5.9	100	95.8	328	37.6	0.16	8.77	5.49	3.89
Jiangsu	75.8	7.07	11.71	5.65	172.38	6	99.5	62.2	303	42.8	0.14	3.9	2.78	3.01
Zhejiang	76	5.57	8.08	7.12	348.02	8	99.6	80.6	284	36.15	0.12	4.9	3.09	3.71
Anhui	73.93	6.4	24.62	7.39	241.52	2	94.4	51.9	350	36.09	0.11	2.62	1.98	5.42
Fujian	73.7	5.9	24.03	8.7	299.24	5	98.9	63.1	333	37	0.09	2.75	2.14	3.05
Jiangxi	71	5.99	25.46	6.61	232.64	4.2	94.6	66	347	39.05	0.11	2.8	1.89	4.36
Shandong	75.6	6.11	16.04	6.7	124.17	7.76	98.8	73.6	343	38.6	0.14	3.64	2.79	3.08
Henan	73.6	6.32	28.82	7.62	354.29	3.6	88.6	65.6	325	34.34	0.13	2.87	2.18	4.86
Hubei	74.2	5.96	20.02	6.72	310.33	7.3	97.6	66.3	329	37.57	0.1	3.73	2.27	4.04
Hunan	74.1	6.71	35.44	8.85	212.47	9.6	93.7	58	183	35.58	0.13	3.21	2.35	4.7
Guangdong	75.3	4.66	17.79	7.52	325.26	5	84.8	78.3	343	38.49	0.11	4.42	2.66	3.12
Guangxi	73.8	5.99	26.03	10.35	329.2	5.56	91.9	46.5	287	32.11	0.09	2.88	1.94	4.6
Hainan	75.4	5.71	29.22	8.63	322.02	4.6	77.2	50	363	40.48	0.22	3.83	2.31	4.36
Chongqing	76.05	6.3	50.17	6.07	333.77	3.34	91.5	43.5	289	31.81	0.13	2.59	2.19	5.77
Sichuan	73.8	6.29	48.62	8.35	291.87	3.3	86.6	40.9	310	34.2	0.14	2.9	2.3	4.92
Guizhou	69.3	6.6	66.67	11.46	342.89	2.1	82.5	30	243	30.53	0.13	2.14	1.83	6.13
Yunnan	69.41	6.22	50.4	12.17	215.58	3.2	95.4	50.5	351	30.95	0.15	2.83	2.53	6.4
Tibet	66.33	5.1	265.38	23.32	197.7	0.27	90.6	0.1	359	24.4	0.34	2.95	2.39	4.12
Shannxi	73.4	6.16	36.64	8.85	254.2	4.71	95.7	35	307	37.65	0.22	3.75	2.9	5
Gansu	71.3	6.65	62.63	15.43	487.63	3	91.8	53.8	280	24.14	0.15	3.22	2.51	5.44
Qinghai	69	6.13	78.7	14.8	463.63	2.1	100	40.5	296	27.47	0.22	3.9	2.92	6.38
Ningxia	72.5	5.04	47.42	14.36	405.51	4.3	90.1	36	303	33.53	0.23	4.16	2.95	6.31
Xinjiang	71.4	5.01	73.71	17.92	657.53	1.6	99.1	35.5	306	32.03	0.36	5.12	4.27	5.37
Table S1-7. The original data of measurement of citizens’ health levels in 2008
The criteria layer	Health status						Health environment				Health services and guarantees
The index layer	Life expectancy per capita	Population mortality	Maternal mortality rate	Perinatal mortality	Statutory reporting of the incidence of infectious diseases in category A & B	Health literacy levels of citizens	Safe water popularizing rate	Rural sanitary toilet popularizing rate	The number of days when the air quality reaches or is better than type II	Landscaping ratio	Hospitals per 10,000 people	Health technicians per 1,000 people	Number of beds in medical and health institutions per 1,000 people	Total health expenditure as a percentage of GDP
Unit	year	‰	1/100000	‰	1/100000	%	%	%	day	%	pcs	person	pcs	%
Beijing	80.27	4.75	18.2	4.36	312.99	10.7	100	74.4	274	37.15	0.3	12.21	6.65	6.01
Tianjin	79.79	5.94	7.3	8.69	242.47	8.8	100	89.6	322	30.3	0.21	6.69	4.22	4.2
Hebei	73.3	6.49	11.6	8.73	199.56	4.11	100	47	320	38.71	0.16	3.47	2.77	4.01
Shanxi	72.8	6.01	28.8	10.04	291.32	3.11	93.3	47.3	334	35.16	0.3	4.65	3.47	4.9
Inner Mongolia	72.6	5.54	30.7	10.41	343.83	5.42	82	32.6	325	30.55	0.19	4.5	3.01	3.58
Liaoning	74.7	5.22	15.3	10.27	214.14	6.24	96.9	55.3	323	38.06	0.2	5.13	3.92	3.68
Jilin	74.22	5.04	27.3	9.83	233.96	4.65	88.6	65.5	320	31.5	0.21	4.72	3.45	5.08
Heilongjiang	74.6	5.68	21.7	10.51	241.08	4.9	84.2	59.5	333	31.39	0.24	4.23	3.29	5.62
Shanghai	81.28	6.17	7.8	2.8	224.95	6.97	100	96.4	328	38	0.14	9.16	5.55	3.97
Jiangsu	76.1	7.04	9.3	5.31	166.02	7	99.9	69.6	310	42.55	0.14	3.94	3.01	3.11
Zhejiang	77.5	5.62	6.6	6.67	345.01	8.45	99.7	83.8	285	37.74	0.12	5.18	3.19	4.09
Anhui	74.22	6.6	20.5	8.75	219.27	2.45	95.1	53.3	257	35.97	0.12	2.79	2.23	5.4
Fujian	73.8	5.9	16.8	7.82	318.18	5.5	97.5	68.8	349	38.86	0.09	2.97	2.37	3.22
Jiangxi	73.63	6.01	16	6.1	230.69	4.6	96.5	68.4	344	41.8	0.11	3.05	2.05	4.68
Shandong	75.9	6.16	12.3	7.02	123.6	8.16	99.4	75.9	320	39.8	0.13	4	3.17	3.26
Henan	72.8	6.45	21	8.37	342.94	3.9	85.6	68	275	35.38	0.12	2.95	2.4	5.25
Hubei	74.7	6.5	17.3	6.66	314.89	7.7	97.9	67.8	338	37.63	0.1	3.83	2.52	4.35
Hunan	74.3	7.28	30.5	8.04	224.6	10.6	94.6	59.5	260	35.83	0.12	3.34	2.52	4.94
Guangdong	75.3	4.55	16.4	7.43	336.37	5.18	94	79.5	345	40.31	0.1	4.65	2.8	3.23
Guangxi	74.3	5.7	21.7	10.22	335.72	6	92.9	49.2	352	32.67	0.09	3.03	2.13	4.63
Hainan	75.7	5.72	21.3	8.72	295.56	4.85	83.9	52.8	366	42.13	0.22	3.92	2.39	5.14
Chongqing	76.41	6.3	35.2	6.03	336.23	3.41	93.2	45.7	297	35.91	0.13	2.72	2.39	4.97
Sichuan	73.93	7.15	39.1	7.73	241.09	3.49	88.1	43.9	319	35.3	0.14	3	2.58	5.13
Guizhou	70	6.77	56.2	13.45	357.38	2.4	88.7	33.7	338	29.83	0.13	2.21	1.94	6.1
Yunnan	69.4	6.31	47.7	12.03	188.8	6.3	95.2	52.3	355	32.04	0.15	2.86	2.69	6.19
Tibet	67	5.2	234	25.8	160.03	0.29	86.6	0.1	353	25.13	0.34	3.35	2.97	4.31
Shannxi	73.8	6.21	25.5	9.64	240.22	4.81	96.7	37.6	320	38.72	0.22	3.89	3.1	5.07
Gansu	71.6	6.68	41.7	14.15	504.46	3.5	87.9	56.5	319	25.88	0.15	3.27	2.7	6.89
Qinghai	69.3	6.14	50.6	13.73	504.08	2.2	100	42.6	296	28.17	0.23	4.09	3.09	6.17
Ningxia	73	4.62	25.1	11.91	357.49	4.42	87.3	37.9	330	37.81	0.24	4.23	3.16	6.46
Xinjiang	72	4.88	62	19.17	738.19	2.1	92.8	39.9	310	31.86	0.35	5.13	4.48	6.28
Table S1-8. The original data of measurement of citizens’ health levels in 2009
The criteria layer	Health status						Health environment				Health services and guarantees
The index layer	Life expectancy per capita	Population mortality	Maternal mortality rate	Perinatal mortality	Statutory reporting of the incidence of infectious diseases in category A & B	Health literacy levels of citizens	Safe water popularizing rate	Rural sanitary toilet popularizing rate	The number of days when the air quality reaches or is better than type II	Landscaping ratio	Hospitals per 10,000 people	Health technicians per 1,000 people	Number of beds in medical and health institutions per 1,000 people	Total health expenditure as a percentage of GDP
Unit	year	‰	1/100000	‰	1/100000	%	%	%	day	%	pcs	person	pcs	%
Beijing	80.47	4.56	15	4.96	339.89	11.7	100	85.5	285	47.69	0.28	12.92	7.22	6.04
Tianjin	80.65	5.7	9.6	9.38	186.96	9.7	100	91.2	307	30.33	0.21	6.9	4.71	4.19
Hebei	73.4	6.43	11.9	6.96	204.71	4.34	100	50.2	334	40.02	0.16	3.71	3.21	4.14
Shanxi	73.4	5.98	17.3	8.88	281.46	4.19	95.4	49.3	316	36.49	0.34	5.38	4.17	5.62
Inner Mongolia	73.5	5.61	30.2	9.53	358.11	5.77	87.9	34.5	336	32.44	0.19	5.5	3.55	3.6
Liaoning	75.54	5.09	10	9.54	215.84	7.29	97.2	59.1	342	38.33	0.19	5.32	4.49	4.02
Jilin	74.73	4.74	25.8	9.63	258.48	4.65	88.8	66.7	327	32.78	0.2	4.87	3.98	5.4
Heilongjiang	75.3	5.42	18.5	9.4	243.33	5.7	86.6	62.9	336	33.62	0.24	4.56	3.82	7.16
Shanghai	81.73	5.94	5.5	2.58	221.26	9.4	100	96.6	334	38.1	0.13	9.48	7.11	4.36
Jiangsu	76.43	6.99	5.2	4.8	164.65	9.55	99.7	76.7	328	41.99	0.14	4.16	3.38	3.15
Zhejiang	77.6	5.59	9.5	6.08	324.6	8.99	99.8	86.5	354	38.2	0.12	5.65	3.61	4.34
Anhui	74.73	6.6	19.2	6.72	195.43	3.51	95.3	54.1	319	37.16	0.12	3.07	2.56	5.95
Fujian	73.8	6	14.6	7.38	320.16	6.1	99.2	72.9	353	39.71	0.11	3.74	2.97	3.23
Jiangxi	73.98	5.98	13.7	5.56	239.06	5.2	98	71.5	355	44.36	0.11	3.25	2.49	5.18
Shandong	76.2	6.08	12.8	6.83	115.69	8.56	99.5	80.5	320	41.18	0.14	4.39	3.68	3.43
Henan	73.7	6.46	16.9	6.23	330.62	4.57	88.3	69.1	328	36.29	0.13	3.38	2.83	5.97
Hubei	75	6	17.7	5.97	314.03	8.1	97.5	70.2	343	37.79	0.11	4.02	3.05	4.7
Hunan	74.5	6.94	27.1	7.71	231.94	11.6	94.8	60.8	312	36.59	0.12	3.62	3.02	5.19
Guangdong	75.3	4.52	13.7	6.81	350.01	5.42	97.7	81.9	347	40.75	0.11	5.04	3.25	3.3
Guangxi	74.7	5.64	23.5	9.4	333.75	6.34	94.4	53.2	337	33.69	0.09	3.32	2.52	5.25
Hainan	76	5.7	24.5	7.72	268.81	5.02	89.7	59.2	365	41.88	0.22	4.3	2.67	5.72
Chongqing	76.21	6.2	30.1	5.57	272.39	3.47	94.6	48.7	303	38.48	0.14	3.05	2.83	5.59
Sichuan	74.4	6.43	29.1	7.09	239.49	5.02	89.7	54.4	315	36.4	0.15	3.37	3.06	6.23
Guizhou	70.5	6.69	50.4	11.82	338.53	2.74	92.1	35.3	346	27.44	0.15	2.37	2.39	7.28
Yunnan	69.5	6.45	41.5	10.71	188.5	3.81	96.2	53.7	362	36.29	0.16	3.02	3.14	6.93
Tibet	67.6	5.07	232.2	23.51	296.28	0.34	92.5	0.1	361	29.62	0.34	3.49	2.94	4.42
Shannxi	74.3	6.24	21.9	7.88	243.62	4.98	98.1	40.9	327	38.76	0.22	4.46	3.5	4.82
Gansu	71.9	6.71	36.2	11.8	478.33	4.3	89.7	57.8	307	27.32	0.15	3.38	3.01	7.79
Qinghai	69.7	6.19	48.2	9.36	648.47	2.3	99.5	45.5	280	29.02	0.23	4.43	3.55	7.21
Ningxia	73.38	4.7	20.7	12.71	317.41	4.58	97.2	41.8	328	38.75	0.25	4.48	3.48	6.32
Xinjiang	72	5.43	41.4	16.77	599.49	3	99	42.5	312	36.3	0.35	5.47	5.06	7.74
Table S1-9. The original data of measurement of citizens’ health levels in 2010
The criteria layer	Health status						Health environment				Health services and guarantees
The index layer	Life expectancy per capita	Population mortality	Maternal mortality rate	Perinatal mortality	Statutory reporting of the incidence of infectious diseases in category A & B	Health literacy levels of citizens	Safe water popularizing rate	Rural sanitary toilet popularizing rate	The number of days when the air quality reaches or is better than type II	Landscaping ratio	Hospitals per 10,000 people	Health technicians per 1,000 people	Number of beds in medical and health institutions per 1,000 people	Total health expenditure as a percentage of GDP
Unit	year	‰	1/100000	‰	1/100000	%	%	%	day	%	pcs	person	pcs	%
Beijing	80.81	4.41	13.1	4.43	268.99	12.7	100	91.4	286	46.7	0.28	13.58	7.35	5.76
Tianjin	78.9	5.58	9.6	8.56	173.54	10.6	100	96	308	32.06	0.21	7.12	4.93	3.9
Hebei	75	6.41	18.4	6.28	199.99	5.29	100	53.2	337	42.73	0.17	4	3.42	4.42
Shanxi	74.92	5.38	14.6	9.28	264.94	5.29	97.3	53.5	324	38.01	0.34	5.58	4.49	5.04
Inner Mongolia	74.44	5.54	35.2	8.43	324.57	6.11	88	37	341	33.35	0.19	5.13	3.81	3.74
Liaoning	76.38	6.26	12.1	9.04	207.08	8.34	97.4	64.1	346	39.32	0.19	5.46	4.8	4.19
Jilin	76.18	5.88	28.1	9.72	245.63	7.14	89.6	73.2	341	34.12	0.21	5.08	4.22	5.24
Heilongjiang	75.98	5.03	21.7	8.29	239.48	6.5	88.4	66.8	340	34.89	0.24	5	4.16	5.84
Shanghai	80.3	5.07	6.6	2.49	185.62	11.83	100	97.6	336	38.15	0.13	9.71	7.44	4.42
Jiangsu	76.63	6.88	3.6	4.63	138.19	11.2	99.6	83	324	42.07	0.15	4.4	3.61	2.97
Zhejiang	77.73	5.54	7.4	5.78	296.48	9.53	99.8	88.9	353	38.3	0.13	6.08	3.88	4.12
Anhui	75.08	5.95	21.9	6.95	176.16	4	96.1	57.6	351	37.5	0.12	3.1	2.75	5.83
Fujian	75.76	5.16	12.2	6.41	292.65	6.7	99.5	79.7	351	40.97	0.12	4.05	3.2	3.21
Jiangxi	74.33	6.06	11.2	4.51	210.36	6	97.4	77.7	360	46.62	0.11	3.37	2.66	4.68
Shandong	76.46	6.26	11.5	6.25	102.48	8.21	99.6	84.1	308	41.47	0.14	4.71	4.01	3.43
Henan	74.57	6.57	15.2	5.09	289.49	5.24	91	69.8	268	36.56	0.13	3.45	3.03	5.91
Hubei	74.9	6.02	15.4	5.22	278.59	8.5	97.6	73.6	338	37.74	0.11	4.16	3.26	4.27
Hunan	74.7	6.7	26.7	7.12	212.91	12.4	95.2	63.1	338	36.64	0.11	3.81	3.3	4.61
Guangdong	76.49	4.21	10.5	6.34	327.53	5.68	98.4	85.8	361	41.31	0.1	5.34	3.52	3.28
Guangxi	75.11	5.48	20.7	8.67	331.41	6.66	94.7	60	339	34.96	0.1	3.56	2.7	5.38
Hainan	76.3	5.73	22.7	7.38	261.51	5.19	89.4	67.3	365	42.63	0.22	4.41	2.9	5.49
Chongqing	75.7	6.4	23	5.19	240.82	3.85	94.1	54.1	311	40.57	0.14	3.36	3.14	5.46
Sichuan	74.75	6.62	22.8	5.93	225.42	6.14	90.8	62.2	319	37.88	0.16	3.62	3.35	5.68
Guizhou	71.1	6.55	35.4	9.29	277.47	3.18	94.1	38.5	337	29.58	0.16	2.48	2.51	7.16
Yunnan	69.54	6.56	37.3	9.89	178.81	3.04	96.5	56.4	362	37.31	0.17	3.16	3.47	7.05
Tibet	68.17	5.55	174.8	23.3	187.85	0.39	97.4	0.1	361	25.4	0.34	3.43	3.01	6.11
Shannxi	74.68	6.01	17.3	6.69	212.07	5.15	99.4	45.3	325	38.29	0.22	4.68	3.67	4.57
Gansu	72.23	6.02	33.2	11.1	402.98	5.1	91.6	61.3	298	27.12	0.15	3.65	3.33	7.17
Qinghai	69.96	6.31	45.1	10.53	456.13	2.41	99.9	58.3	312	29.38	0.23	4.53	3.72	6.23
Ningxia	73.38	5.1	29.7	11.99	239.7	4.74	98.2	54.3	332	38.75	0.25	4.66	3.68	5.69
Xinjiang	72.35	5.43	43.2	16.35	539.3	3.9	99.2	67.1	306	36.42	0.37	5.73	5.37	6.91
Table S1-10. The original data of measurement of citizens’ health levels in 2011
The criteria layer	Health status						Health environment				Health services and guarantees
The index layer	Life expectancy per capita	Population mortality	Maternal mortality rate	Perinatal mortality	Statutory reporting of the incidence of infectious diseases in category A & B	Health literacy levels of citizens	Safe water popularizing rate	Rural sanitary toilet popularizing rate	The number of days when the air quality reaches or is better than type II	Landscaping ratio	Hospitals per 10,000 people	Health technicians per 1,000 people	Number of beds in medical and health institutions per 1,000 people	Total health expenditure as a percentage of GDP
Unit	year	‰	1/100000	‰	1/100000	%	%	%	day	%	pcs	person	pcs	%
Beijing	81.12	4.27	9.9	4.34	226.76	13.7	100	97	286	45.6	0.27	14.2	7.4	6.01
Tianjin	80.65	6.08	6.8	8.52	155.4	11.5	100	93.2	320	34.5	0.22	7.33	4.94	3.67
Hebei	73.3	6.52	9.4	5.83	181.18	7.01	100	53.1	339	42.1	0.17	4.11	3.63	4.32
Shanxi	74.9	5.61	16.6	9.01	280.12	6.41	97.5	50.6	332	38.3	0.34	5.47	4.49	4.97
Inner Mongolia	74.71	5.43	16.7	8	332.58	6.45	91.4	43.2	342	34.1	0.2	5.34	4.08	3.83
Liaoning	77.12	6.05	10.7	9.61	233.59	9.39	98.4	60.4	347	39.8	0.19	5.54	5.07	3.98
Jilin	74.63	5.51	16.5	9.85	259.5	10.5	92.7	74.9	345	34.2	0.2	5.1	4.45	4.88
Heilongjiang	76.2	5.92	16.8	7.66	230.88	7.3	90.8	70.1	340	36.3	0.24	5.09	4.31	5.81
Shanghai	82.51	5.1	3.7	2.78	166.9	14.27	100	98	337	38.2	0.13	9.92	7.55	4.85
Jiangsu	76.8	6.98	1.2	3.9	131.51	12.85	99.6	87.4	317	42.1	0.16	4.67	3.94	3.14
Zhejiang	77.81	5.4	6.4	5.49	261.76	10.07	99.8	90.1	360	38.4	0.13	6.42	4.07	4.39
Anhui	74	5.91	15.7	5.25	189.74	4.26	96.6	58	351	39.5	0.15	3.16	2.97	5.83
Fujian	76	5.2	14.2	6.26	276.11	7.3	99.1	85.5	360	41.4	0.13	4.47	3.5	3.52
Jiangxi	74.63	5.98	12.6	4.14	207.6	6.8	97.9	81.2	362	46.8	0.12	3.49	2.85	5.02
Shandong	76	6.4	9.7	4.84	107.02	7.93	99.7	85.7	320	41.5	0.15	5.02	4.34	3.63
Henan	74.8	6.62	10.2	4.22	314.62	5.91	92.6	71.1	268	36.6	0.13	3.63	3.2	4.68
Hubei	75.6	6.01	10.6	5.14	280.36	8.89	98.3	75.2	336	38.4	0.11	4.35	3.63	4.72
Hunan	75	6.8	18.8	6.54	222.13	13.2	95.7	63.2	341	36.8	0.12	3.96	3.61	4.48
Guangdong	76.3	4.35	11.4	5.96	312.24	5.94	98.4	86.7	340	41.1	0.11	5.62	3.76	3.48
Guangxi	75.11	6.04	18.7	8.28	356.13	6.9	93.9	64.1	351	37.4	0.1	3.8	2.83	5.68
Hainan	76.5	5.75	13.6	6.74	262.51	5.36	96.1	67.5	365	41.8	0.22	4.77	3.14	6.47
Chongqing	76.51	6.71	21.6	4.56	245.23	3.98	93.4	58.7	324	40.2	0.15	3.61	3.47	5.11
Sichuan	74.98	6.81	23.1	5.85	223.19	8.62	91.8	64.1	357	38.2	0.17	3.89	3.69	5.81
Guizhou	71.4	6.93	24.3	5.37	263.05	3.96	91.6	40.9	349	32.3	0.18	2.68	2.77	7.43
Yunnan	70	6.36	34.7	9.64	179.52	4.13	95.1	55.7	362	38.7	0.18	3.31	3.8	7.64
Tibet	68.51	5.13	180.7	20.27	232.82	0.45	91.9	0.1	354	24.1	0.34	3.57	3.17	9.1
Shannxi	74.89	6.06	13.3	6.17	217.05	5.32	95.7	49.4	327	38.7	0.23	5.04	3.94	5.84
Gansu	72.23	6.03	30.7	9.54	422.83	5.9	92.5	68	289	27.9	0.15	3.88	3.48	7.84
Qinghai	70.36	6.12	46.1	10.72	431.37	2.52	99.9	57.9	316	31.1	0.23	4.94	4.15	6.54
Ningxia	73.38	4.68	22.8	11.39	262.1	4.9	95.5	56.6	326	37.5	0.24	4.91	3.96	5.53
Xinjiang	72.35	4.42	39.1	16.31	590.92	4.8	99.2	58.8	276	36.6	0.37	5.93	5.69	7.72
Table S1-11. The original data of measurement of citizens’ health levels in 2012
The criteria layer	Health status						Health environment				Health services and guarantees
The index layer	Life expectancy per capita	Population mortality	Maternal mortality rate	Perinatal mortality	Statutory reporting of the incidence of infectious diseases in category A & B	Health literacy levels of citizens	Safe water popularizing rate	Rural sanitary toilet popularizing rate	The number of days when the air quality reaches or is better than type II	Landscaping ratio	Hospitals per 10,000 people	Health technicians per 1,000 people	Number of beds in medical and health institutions per 1,000 people	Total health expenditure as a percentage of GDP
Unit	year	‰	1/100000	‰	1/100000	%	%	%	day	%	pcs	person	pcs	%
Beijing	81.35	4.31	6.6	4.57	174.45	24.7	100	97	281	46.2	0.28	9.48	4.84	6.66
Tianjin	80.92	6.12	9.2	7.89	146.33	12.4	100	93.3	305	34.9	0.22	5.45	3.79	3.72
Hebei	73.6	6.41	10.5	5.23	184.24	9.5	100	55.8	340	41	0.17	4.32	3.9	4.7
Shanxi	74.9	5.83	11.7	7.85	310.18	7.56	97.6	52.2	348	38.6	0.34	5.53	4.58	5.49
Inner Mongolia	74.98	5.52	20.1	7.01	323.6	6.8	94.4	46	346	36.2	0.21	5.62	4.45	3.9
Liaoning	77.86	6.54	7.9	7.99	230.88	10.46	98.5	64.2	320	40.2	0.2	5.62	5.26	4.07
Jilin	74.83	5.37	16.4	8.9	233.14	9.63	92.4	75.5	339	33.9	0.21	5.24	4.64	5.43
Heilongjiang	76.38	6.03	17.4	7.52	224.87	8.1	94.1	70.7	345	36	0.26	5.25	4.65	6.02
Shanghai	82.41	5.36	2	2.67	190.71	19.56	100	98	343	38.3	0.13	6.21	4.61	5.41
Jiangsu	76.98	6.99	1.4	3.77	121.91	14.5	99.7	90.9	223	42.2	0.18	5	4.21	3.5
Zhejiang	77.91	5.52	4	5.01	209.14	10.64	99.9	91.5	359	39.9	0.14	6.02	3.89	4.45
Anhui	74.83	6.14	11.5	5.26	197.97	4.73	98	59.2	352	38.8	0.16	3.94	3.71	6.46
Fujian	76.3	5.73	11.4	6.03	287.07	7.9	99.1	88.5	364	42	0.14	4.7	3.72	3.44
Jiangxi	74.93	6.14	11.3	3.98	206.11	7.6	97.7	84.4	360	46	0.12	3.99	3.64	5.08
Shandong	75.8	6.95	10.1	4.78	114.6	8.16	99.9	88.3	324	42.1	0.16	5.47	4.89	3.86
Henan	75	6.71	9.2	3.98	314.18	6.6	91.8	72.9	260	36.9	0.14	4.56	4.19	5.13
Hubei	75.86	6.12	10.1	4.96	264.74	9.3	98.2	76.7	321	38.9	0.11	5	4.38	4.92
Hunan	75.2	7.01	19.6	5.94	242.29	14	96.4	64.8	332	37	0.12	4.47	4.32	4.86
Guangdong	76.1	4.65	9.9	5.84	317.55	6.21	97.6	88.6	360	41.2	0.11	4.89	3.35	3.83
Guangxi	75.11	6.31	17.4	7.97	332.95	7.35	95.3	72.8	352	37.5	0.1	4.72	3.6	6
Hainan	76.7	5.81	25.8	5.84	278.47	5.53	97.7	70	366	41.2	0.22	5.08	3.42	6.31
Chongqing	77.2	6.86	15	4.71	245.58	4.94	93.8	60.8	340	42.9	0.16	4.47	4.44	5.45
Sichuan	75.25	6.92	18.9	5.17	216.73	6.49	92	67.4	354	38.7	0.19	4.82	4.83	5.89
Guizhou	71.8	6.96	26.1	4.86	257.48	4.3	92.1	43.9	356	32.8	0.22	3.72	4	7.01
Yunnan	70.5	6.41	28	8.47	206.13	5.2	94.3	58.7	362	39.3	0.2	3.58	4.18	7.35
Tibet	68.7	5.21	176.1	24.04	230.95	0.5	75.4	0.2	354	32.4	0.34	3.03	2.72	9.13
Shannxi	75.11	6.24	10.7	5.6	225.39	5.51	96.2	51.5	329	40.4	0.24	5.76	4.51	5.95
Gansu	72.23	6.05	24.4	8.51	306.4	6.8	92.8	66.5	321	30	0.16	4.33	4.36	7.87
Qinghai	70.76	6.06	36.2	8.93	464.44	1.48	99.9	62.6	315	32.5	0.25	5.11	4.54	7.52
Ningxia	73.8	4.33	27.5	11.2	265.31	5.06	92.3	59.2	329	38.4	0.22	5.29	4.29	5.77
Xinjiang	72.35	4.48	34.1	14.38	624.48	5.7	99.1	64.3	292	35.9	0.37	6.12	5.89	7.55
Table S1-12. The original data of measurement of citizens’ health levels in 2013
The criteria layer	Health status						Health environment				Health services and guarantees
The index layer	Life expectancy per capita	Population mortality	Maternal mortality rate	Perinatal mortality	Statutory reporting of the incidence of infectious diseases in category A & B	Health literacy levels of citizens	Safe water popularizing rate	Rural sanitary toilet popularizing rate	The number of days when the air quality reaches or is better than type II	Landscaping ratio	Hospitals per 10,000 people	Health technicians per 1,000 people	Number of beds in medical and health institutions per 1,000 people	Total health expenditure as a percentage of GDP
Unit	year	‰	1/100000	‰	1/100000	%	%	%	day	%	pcs	person	pcs	%
Beijing	81.51	4.52	10.2	3.75	155.87	25.8	100	97	167	47.1	0.28	15.46	4.92	6.87
Tianjin	81.19	6	8.8	7.25	143.07	13.12	100	93.4	145	34.9	0.23	8.05	3.92	3.84
Hebei	73.9	6.87	10.7	4.81	181.6	10.5	99.9	56.7	129	41.2	0.17	4.44	4.14	5.25
Shanxi	74.9	5.57	15.6	7.86	296.86	8.7	98.1	53.2	183	40	0.34	5.77	4.76	5.81
Inner Mongolia	75.25	5.62	15.5	6.55	295.05	7.35	96.2	50	344	36.2	0.23	6.01	4.81	4.15
Liaoning	78.6	6.12	8.3	7.49	209.54	11.23	98.8	66.9	263	40.2	0.21	6.01	5.51	4.35
Jilin	75.43	5.04	17.1	8.88	194.96	9.7	93.8	76.1	335	31.4	0.21	5.45	4.84	5.89
Heilongjiang	76.59	6.08	14.8	7.3	216.1	8.9	95.5	72.7	339	36	0.26	5.49	4.93	6.73
Shanghai	82.47	5.24	9.3	2.44	173.78	18.24	100	98.8	246	38.4	0.14	10.97	4.73	5.78
Jiangsu	77.15	7.01	1.9	3.43	116.74	15.2	99.7	93.1	220	42.4	0.19	5.63	4.64	3.74
Zhejiang	77.96	5.45	6.2	4.82	192.46	12.3	100	93.2	250	40.3	0.15	7.3	4.18	4.56
Anhui	75.43	6.06	13.7	4.68	198.32	6.71	98.4	62.6	316	39.9	0.16	3.66	3.91	6.42
Fujian	76.5	6.01	12	5.12	280.57	8.5	99.4	90.7	339.5	42.8	0.14	5.44	4.14	3.84
Jiangxi	75.26	6.28	10.7	3.49	206.37	8.4	97.7	86.9	348	45.1	0.12	3.94	3.85	5.15
Shandong	76.6	6.4	9.3	4.73	124.05	9.29	99.9	90.1	182	42.6	0.18	6.21	5.03	4.11
Henan	75.2	6.76	10.3	3.92	242.13	3.7	92.2	74.4	134	37.6	0.15	4.24	4.57	5.24
Hubei	75.9	6.15	11.6	4.84	254.81	9.75	98.2	82.4	305	38.1	0.12	5.01	4.97	4.99
Hunan	75.5	6.96	16	5.43	254.89	14.8	96.9	65.7	313	37.6	0.14	4.52	4.69	5.33
Guangdong	76.5	4.69	8.4	5.14	317.12	8.5	97.5	90	274	41.5	0.11	6.32	3.55	4.05
Guangxi	75.11	6.35	14.2	8.05	289.47	6.57	95.9	78.4	348	37.7	0.1	4.44	3.97	5.89
Hainan	76.9	5.9	17.9	5.36	313.16	5.7	98.4	78.8	342	42.1	0.21	5.29	3.59	5.88
Chongqing	77.61	6.77	17.1	4.56	254.55	8.38	96.3	63	207	41.7	0.18	4.23	4.96	5.83
Sichuan	75.7	6.9	20.7	5.03	198.29	7.04	91.8	71	325	38.4	0.21	4.68	5.26	6.38
Guizhou	72.2	7.15	22.6	4.93	261.95	3.78	92.9	47.7	311	34.5	0.28	3.64	4.76	6.9
Yunnan	71	6.43	26.7	7.22	206.43	6.26	97.9	60.8	333	37.8	0.21	4.2	4.48	7.23
Tibet	69.03	5.39	154.5	18.82	237.57	0.58	97	0.2	348	18.1	0.34	3.67	3.53	9.14
Shannxi	75.32	6.15	13.3	5.1	207.73	6.15	96.5	50.8	328	40.2	0.25	6.04	4.92	6.34
Gansu	72.6	6.08	23	8.23	208.99	4.9	93.7	66.9	256	32.1	0.16	4.33	4.49	8.27
Qinghai	71.3	6.13	44	7.68	480.59	2.77	99.1	64.9	221	31.2	0.25	5.66	5.11	7.74
Ningxia	73.9	4.5	15.1	9.59	253.33	6.1	96.5	61.7	251	38.5	0.24	5.58	4.76	6.55
Xinjiang	72.35	4.92	33.8	13.89	618.99	6.6	98.1	70.1	280	36.4	0.38	6.43	6.06	7.98
Table S1-13. The original data of measurement of citizens’ health levels in 2014
The criteria layer	Health status						Health environment				Health services and guarantees
The index layer	Life expectancy per capita	Population mortality	Maternal mortality rate	Perinatal mortality	Statutory reporting of the incidence of infectious diseases in category A & B	Health literacy levels of citizens	Safe water popularizing rate	Rural sanitary toilet popularizing rate	The number of days when the air quality reaches or is better than type II	Landscaping ratio	Hospitals per 10,000 people	Health technicians per 1,000 people	Number of beds in medical and health institutions per 1,000 people	Total health expenditure as a percentage of GDP
Unit	year	‰	1/100000	‰	1/100000	%	%	%	day	%	pcs	person	pcs	%
Beijing	81.81	4.92	7.7	4.05	165.49	26.9	100	98.2	168	47.4	0.28	9.91	5.1	7.48
Tianjin	81.08	6.05	9.3	7.19	148.98	16.36	100	93.6	175	34.9	0.25	5.6	4.01	4.14
Hebei	74.23	6.23	8.8	4.53	186.29	9.68	99.3	60.9	152	41.9	0.18	4.76	4.37	5.59
Shanxi	74.9	5.93	14.4	7.22	292.45	9.25	98.5	53.6	213.6	40.1	0.34	5.74	4.86	6.26
Inner Mongolia	75.52	5.75	19.6	6.3	300.81	7.9	97.8	53.1	308	39.8	0.26	6.17	5.15	4.01
Liaoning	79.16	6.23	10.7	6.89	236.07	12	98.7	68.4	258	40.1	0.22	5.84	5.82	4.65
Jilin	75.81	6.22	25.8	7.47	203.27	12.4	93.8	76.6	270	35.8	0.21	5.5	5.12	5.6
Heilongjiang	76.79	6.46	14.8	6.64	207.8	9.7	96.2	74.4	327	36	0.26	5.54	5.25	6.6
Shanghai	82.29	5.21	5	2.43	174.2	18.61	100	96.5	278	38.4	0.14	6.76	4.84	5.71
Jiangsu	77.31	7.02	1.9	3.28	117.29	15.94	99.8	96.1	229.22	42.6	0.19	5.76	4.93	4.06
Zhejiang	78.09	5.51	5.5	4.51	193.92	15.78	99.9	94.8	296	40.8	0.17	6.82	4.46	4.92
Anhui	75.81	5.89	11.5	4.41	190.33	9.45	98.6	65.2	321	41.2	0.16	4.41	4.14	6.34
Fujian	76.8	6.2	10.3	5.25	274.6	11.66	99.5	91.8	333.33	42.8	0.15	5.43	4.33	4.04
Jiangxi	75.59	6.26	9	3.29	207.73	9.2	97.8	89	287	44.6	0.12	4.43	4.11	5.41
Shandong	77.3	6.84	9.5	4.51	131.65	10.52	99.9	91.6	199	42.8	0.19	6.17	5.11	4.18
Henan	75.4	7.02	11.2	3.98	216.68	7.3	93	75.3	155.57	38.3	0.15	5.24	4.87	5.38
Hubei	76.2	6.96	9	4.64	246.85	10.19	98.8	82.5	288	37.9	0.13	5.77	5.46	5.09
Hunan	75.65	6.89	14.9	5.59	246.9	15.6	97.1	68.5	332	38.6	0.15	5.07	5.28	5.4
Guangdong	76.8	4.7	8.4	5.05	360.75	10.88	97.3	91.1	310	41.4	0.12	5.44	3.78	4.18
Guangxi	75.11	6.21	14.1	7.74	280.13	6.18	94.4	83.3	349	39.3	0.1	5.44	4.24	5.79
Hainan	77.1	5.95	15	5.79	326.23	5.87	98.1	79.3	346	41.3	0.21	5.6	3.82	6.3
Chongqing	77.78	7.05	18.3	4.32	250.39	9.27	96.8	64.5	246	40.6	0.19	5.16	5.37	5.76
Sichuan	76.06	7.02	18.6	4.53	182.88	7.8	91.1	74.3	330	37.5	0.22	5.55	5.65	6.58
Guizhou	72.64	7.18	26.8	5.44	254.2	3	94.5	48.9	298	34	0.3	4.85	5.19	6.99
Yunnan	71.5	6.45	22.1	7.25	208.52	6.6	97.9	62.8	355	38.1	0.22	4.43	4.77	7.24
Tibet	68.78	5.21	108.9	16.75	267.66	0.66	89.1	0.2	354	43.8	0.35	4.05	3.75	8.9
Shannxi	75.53	6.26	11.6	4.53	201.45	7.08	96.3	50.8	230	40.5	0.26	6.69	5.28	6.35
Gansu	73	6.11	19.5	7.34	193.06	5.8	95	68.9	261.5	30.8	0.16	4.88	4.72	8.34
Qinghai	71.7	6.18	33.3	6.99	387.77	4.06	99.7	65.2	266	31.6	0.32	5.82	5.66	7.61
Ningxia	74.1	4.53	14.8	8.64	268.94	7.2	97.3	63.2	279	38	0.24	6.01	4.91	7.51
Xinjiang	72.35	4.97	39.1	14.27	611.78	8.9	98.2	73.6	280	36.8	0.38	6.68	6.22	8.1
Table S1-14. The original data of measurement of citizens’ health levels in 2015
The criteria layer	Health status						Health environment				Health services and guarantees
The index layer	Life expectancy per capita	Population mortality	Maternal mortality rate	Perinatal mortality	Statutory reporting of the incidence of infectious diseases in category A & B	Health literacy levels of citizens	Safe water popularizing rate	Rural sanitary toilet popularizing rate	The number of days when the air quality reaches or is better than type II	Landscaping ratio	Hospitals per 10,000 people	Health technicians per 1,000 people	Number of beds in medical and health institutions per 1,000 people	Total health expenditure as a percentage of GDP
Unit	year	‰	1/100000	‰	1/100000	%	%	%	day	%	pcs	person	pcs	%
Beijing	81.95	4.95	8.5	3.25	150.86	28	100	98.4	186	48.4	0.29	10.4	5.14	7.99
Tianjin	81.33	5.61	8.1	6.72	131.85	19.6	100	93.6	216	36.4	0.26	5.9	4.12	4.55
Hebei	74.6	5.79	8.8	4.11	184.92	8.5	99.6	68.8	192	41.2	0.21	5	4.61	6.25
Shanxi	74.9	5.56	13.1	6.95	268.21	9.6	98.9	56	259	40.1	0.35	5.8	5	7.23
Inner Mongolia	76.78	5.32	18.3	5.54	268.4	8.7	98.5	62.6	292	39.2	0.28	6.5	5.33	4.65
Liaoning	78.9	6.59	8.5	6.08	211.18	12.47	98.8	72.8	260	40.3	0.23	6	6.09	4.92
Jilin	76.1	5.53	15.4	6.65	174.26	10	93.6	76.5	269	36.1	0.22	5.8	5.25	5.92
Heilongjiang	76.99	6.6	16.8	6.65	199.76	10.5	97.2	75.9	327	35.8	0.27	5.6	5.58	6.92
Shanghai	82.75	5.07	5.7	2.15	186.91	21.94	100	98.6	252	38.5	0.14	7	5.08	6.12
Jiangsu	77.51	7.03	2.3	3.11	124.24	19	99.8	96.9	237.22	42.8	0.2	6.1	5.19	4.24
Zhejiang	78.22	5.5	5.3	3.98	193.24	18.09	100	96.5	310	40.6	0.19	7.3	4.92	5.25
Anhui	76.4	5.94	14	4.2	242.66	13.03	98.8	67.1	284	41.2	0.17	4.6	4.35	6.64
Fujian	77.04	6.1	10.1	4.82	278.24	12	99.6	94	353	43	0.15	5.5	4.51	4.35
Jiangxi	75.9	6.24	8.3	3.07	227.94	10	97.6	89.4	300.5	44.1	0.12	4.6	4.33	5.85
Shandong	78	6.67	8.5	3.92	130.9	11.07	100	92.2	214	42.3	0.2	6.3	5.27	4.51
Henan	75.6	7.05	10.5	3.92	204.76	8.27	93.1	75.6	173.29	37.7	0.16	5.5	5.16	6.1
Hubei	76.5	5.83	9.1	4.37	251.55	10.7	98.8	83	243	37.5	0.15	6.3	5.86	5.58
Hunan	75.9	6.86	14.2	4.84	244.74	16.4	97.3	74.4	284	39.7	0.17	5.5	5.85	5.61
Guangdong	77.1	4.32	6.1	4.64	313.19	13.37	98.5	92.3	332	41.4	0.12	5.7	4.02	4.53
Guangxi	76.93	6.15	14.2	7.19	262.75	5.41	97.5	85.7	323	37.6	0.11	5.7	4.47	6
Hainan	77.3	6	8.3	5.01	342.48	6.1	98.6	82.4	349	37.7	0.22	6	4.25	7.09
Chongqing	76.7	7.19	11.1	3.98	262.08	10.16	96.9	66.2	292	40.3	0.21	5.5	5.85	6.36
Sichuan	76.35	6.94	17.8	4.02	187.72	6.9	93.1	77.7	271.5	38.7	0.24	5.8	5.96	7.2
Guizhou	73	7.2	20.5	5.04	266.61	2.7	95.4	54.8	330.5	35.9	0.34	5.3	5.57	7.18
Yunnan	73.6	6.48	23.6	7.05	207.72	8.9	97.3	64.6	346.67	37.3	0.23	4.8	5.01	8.04
Tibet	68.2	5.1	100.9	16.9	325.52	0.17	88.1	0.2	341	42.6	0.43	4.4	4.33	10.13
Shannxi	75.7	6.28	9.2	4.27	200.14	8.3	97.1	55.4	253	40.6	0.27	7	5.59	6.96
Gansu	73.25	6.15	15.1	7.43	188.74	4.7	97.3	71.8	276.5	30.2	0.17	5	4.91	9.63
Qinghai	71.7	6.17	31.9	6.96	414.3	5.66	99.1	66.6	302	29.8	0.31	6	5.87	8.93
Ningxia	74.3	4.58	23.1	8.31	234.95	8.2	96.4	70.3	270	37.9	0.25	6.2	5.06	7.83
Xinjiang	72	4.51	38.5	14.2	635.11	7.5	98.8	76.5	256	37.5	0.39	6.9	6.37	9.34
Table S1-15. The original data of measurement of citizens’ health levels in 2016
The criteria layer	Health status						Health environment				Health services and guarantees
The index layer	Life expectancy per capita	Population mortality	Maternal mortality rate	Perinatal mortality	Statutory reporting of the incidence of infectious diseases in category A & B	Health literacy levels of citizens	Safe water popularizing rate	Rural sanitary toilet popularizing rate	The number of days when the air quality reaches or is better than type II	Landscaping ratio	Hospitals per 10,000 people	Health technicians per 1,000 people	Number of beds in medical and health institutions per 1,000 people	Total health expenditure as a percentage of GDP
Unit	year	‰	1/100000	‰	1/100000	%	%	%	day	%	pcs	person	pcs	%
Beijing	82.03	5.2	10.5	3.69	137.99	29.4	100	99.8	198	48.4	0.29	10.77	5.39	7.98
Tianjin	81.84	5.54	9.4	7.53	129.66	20.7	100	94.4	226	37.2	0.27	6.08	4.21	4.62
Hebei	76.17	6.36	11.1	4.06	178.97	7.4	99.5	73.2	199.2	40.8	0.22	5.26	4.83	6.31
Shanxi	74.9	5.52	12.1	7.48	243.87	10.17	99.3	58.8	243.4	40.5	0.38	6.13	5.15	7.48
Inner Mongolia	75.8	5.69	15.6	5.96	250.37	9.5	99	71.4	313	39.9	0.29	6.76	5.53	5
Liaoning	78.81	6.78	9.2	6.86	200.7	14.14	99	76.9	225	36.4	0.27	6.34	6.5	6.67
Jilin	76.51	5.6	14.6	6.67	145.87	12.7	93.4	80.6	290.5	35	0.24	6.1	5.53	6.47
Heilongjiang	77.3	6.61	14.8	6.39	181.02	11.3	97.3	80.4	314	35.4	0.27	5.83	5.79	7.74
Shanghai	83.18	5	3.4	2.19	184	23.65	100	99.1	276	38.6	0.14	7.36	5.34	6.52
Jiangsu	77.51	7.03	2.2	3.53	114.56	21.13	99.9	97.4	256	42.9	0.21	6.46	5.54	4.34
Zhejiang	78.4	5.52	5.7	3.9	195.31	20.4	100	98.3	322	41	0.2	7.74	5.19	5.45
Anhui	76	5.96	13	4.22	205.99	16.68	99.2	68.9	271	41.7	0.17	4.74	4.55	6.73
Fujian	77.22	6.2	8.5	4.87	258.79	13.75	99.5	93.9	360.33	43.3	0.15	5.67	4.51	4.34
Jiangxi	75.9	6.16	9.9	2.87	224.09	10.31	97.7	89.1	315	43.6	0.13	4.81	4.55	5.9
Shandong	78.3	7.05	9.6	4.69	137.19	12.08	99.8	92.1	208	42.3	0.2	6.45	5.44	4.93
Henan	75.8	7.11	9.4	3.99	192.25	9.24	93.4	79.6	184.29	39.3	0.17	5.74	5.47	6.11
Hubei	76.5	6.97	8.6	4.63	249.93	11.58	99.1	83	268	37.6	0.16	6.53	6.13	5.89
Hunan	76.2	7.01	13.8	4.59	238.24	17.2	96.8	79.5	296	40.6	0.18	5.75	6.24	6.1
Guangdong	77.24	4.41	7.5	4.61	320.16	12.36	98.1	93.7	338	42.4	0.13	6.05	4.23	5.19
Guangxi	77.03	5.95	12.7	6.6	254.26	8.74	97.7	85.6	341	37.6	0.11	5.99	4.64	6.75
Hainan	77.2	6	17.7	4.4	321.47	6.3	97.4	79.8	361	40.3	0.23	6.27	4.4	7.48
Chongqing	77	7.24	13.1	4.27	263.6	11.82	97.1	67.9	289	40.8	0.23	5.88	6.26	6
Sichuan	76.6	6.99	17.5	3.91	184.9	10.77	93.1	80.9	287	39.9	0.25	6	6.28	8.12
Guizhou	73.4	6.93	22.4	5.06	254.21	5.05	96	58	344.5	36.8	0.34	5.76	5.92	7.46
Yunnan	74.11	6.55	23.3	7.31	187.9	10.4	96.7	64.8	361	37.8	0.25	5.23	5.31	8.88
Tibet	69.33	5.11	109.9	16.52	287.09	0.75	67.6	0.2	328	32.6	0.44	4.49	4.37	10.85
Shannxi	75.7	6.23	9.5	4.28	194.26	9.35	95.6	57.6	264.83	40.1	0.28	7.57	5.91	6.95
Gansu	73.41	6.18	17.1	7.46	200.18	6.9	97.9	75.8	286	31.5	0.17	5.16	5.15	10.47
Qinghai	71.7	6.18	31.5	7.06	426.63	8.16	99.2	69.2	321	31.1	0.34	6.24	5.86	9.32
Ningxia	74.68	4.72	20	8.79	225.97	9.3	94.8	68.5	292	40.4	0.28	6.62	5.38	7.95
Xinjiang	72	4.26	31.9	14.77	606.7	9.6	98.9	64.6	245	38.5	0.38	7.13	6.54	9.97
Table S1-16. The original data of measurement of citizens’ health levels in 2017
The criteria layer	Health status						Health environment				Health services and guarantees
The index layer	Life expectancy per capita	Population mortality	Maternal mortality rate	Perinatal mortality	Statutory reporting of the incidence of infectious diseases in category A & B	Health literacy levels of citizens	Safe water popularizing rate	Rural sanitary toilet popularizing rate	The number of days when the air quality reaches or is better than type II	Landscaping ratio	Hospitals per 10,000 people	Health technicians per 1,000 people	Number of beds in medical and health institutions per 1,000 people	Total health expenditure as a percentage of GDP
Unit	year	‰	1/100000	‰	1/100000	%	%	%	day	%	pcs	person	pcs	%
Beijing	82.15	5.3	8	3.21	139.61	30.8	100	98.1	226	48.4	0.3	11.33	5.56	7.97
Tianjin	81.68	5.05	6	5.83	141.42	21.84	100	93.2	209	36.8	0.27	6.48	4.39	4.69
Hebei	76.4	6.6	8.3	3.24	174.07	10.9	99.1	73.3	202	41.8	0.25	5.66	5.25	6.38
Shanxi	74.9	5.45	13.5	6.25	236.73	11.6	97.8	61.1	200	40.6	0.37	6.3	5.33	7.73
Inner Mongolia	75.8	5.74	13.1	5.41	267.35	10.5	99.1	77.9	311	40.2	0.31	7.13	5.94	5.35
Liaoning	78.88	6.93	13.6	5.97	205.22	14.91	98.5	79.2	213	40.7	0.29	6.66	6.83	7.42
Jilin	76.61	6.5	12.9	5.93	138.74	13.1	94.9	81.5	304	35.8	0.24	6.18	5.66	7.02
Heilongjiang	77.49	6.63	21.3	5.52	174.08	12.1	98.5	72.3	323	35.5	0.29	6.05	6.38	7.56
Shanghai	83.47	5.3	1.1	2.02	185.06	25.36	100	99.2	275	39.1	0.15	7.73	5.57	6.92
Jiangsu	77.7	7.03	10.4	3.43	111.54	23.26	100	97.9	248	43	0.22	6.82	5.84	4.44
Zhejiang	78.6	5.56	4.5	3.74	206.91	23.03	100	98.6	328	40.4	0.21	8.13	5.54	5.65
Anhui	76.7	5.9	15.3	3.79	223.71	20.56	99.4	73.8	243	42.2	0.18	5.01	4.89	6.82
Fujian	77.5	6.2	9.5	4.33	255.13	15.5	99.6	95	357	43.7	0.15	5.92	4.66	4.33
Jiangxi	76	6.08	8.2	2.81	232.42	13.31	98.1	93.9	304	45.2	0.14	5.1	5.06	5.95
Shandong	78.5	7.4	9	4.3	144.89	15.91	99.8	92.3	217	42.1	0.24	6.88	5.84	5.35
Henan	76	6.97	10.4	3.68	192.41	10.21	95.9	75	177.71	39.4	0.17	6.08	5.85	6.12
Hubei	76.5	7.01	9.6	4.13	249.83	13.46	99.3	83.3	288	38.4	0.17	6.77	6.37	6.2
Hunan	76.5	7.08	12.7	4.37	252.23	18	96.5	82.6	297	41.2	0.19	6.06	6.59	6.59
Guangdong	77.2	4.52	6.8	4.4	346.71	14.4	97.8	95.4	326	43.5	0.13	6.33	4.41	5.85
Guangxi	76.93	6.22	14	6.36	265.12	10.14	97.6	91.6	323	39.1	0.12	6.25	4.94	6.5
Hainan	77.5	6.01	23.7	3.97	382.28	6.47	98.4	86.3	359	40.1	0.22	6.52	4.54	7.87
Chongqing	77.26	7.27	15	4.17	283.73	14.88	98.1	66.2	277	40.3	0.24	6.23	6.71	5.64
Sichuan	77.1	7.03	13.4	3.53	190.97	15	94.9	83.4	300	40	0.27	6.39	6.79	8.04
Guizhou	73.78	6.88	23.5	4.96	261.21	7.1	96.5	64.5	345.5	37	0.35	6.31	6.51	7.74
Yunnan	74.4	6.68	19.7	6.07	195.04	14	96.7	73.5	359.67	38.9	0.26	5.91	5.72	9.72
Tibet	70.6	4.95	95	15.94	316.71	1.46	92.8	0.2	356	34.8	0.44	4.9	4.78	10.57
Shannxi	75.7	6.24	9.3	3.71	193.11	10.3	96	47.2	238	39.9	0.3	8.09	6.29	6.94
Gansu	73.41	6.52	14.5	7.53	194.29	8.9	98.8	77.4	311	33.3	0.2	5.59	5.58	10.31
Qinghai	71.8	6.17	29.4	7.32	452.07	10.24	98.9	69.2	337	32.6	0.35	6.98	6.4	9.71
Ningxia	74.68	4.75	23.3	8.13	220.68	10.31	95.7	74.3	296	40.4	0.31	7.29	5.84	8.07
Xinjiang	72	4.48	30.9	12.94	589.41	10.3	98.8	65.6	252	40	0.38	7.12	6.85	10.6
Table S1-17. The original data of measurement of citizens’ health levels in 2018
The criteria layer	Health status						Health environment				Health services and guarantees
The index layer	Life expectancy per capita	Population mortality	Maternal mortality rate	Perinatal mortality	Statutory reporting of the incidence of infectious diseases in category A & B	Health literacy levels of citizens	Safe water popularizing rate	Rural sanitary toilet popularizing rate	The number of days when the air quality reaches or is better than type II	Landscaping ratio	Hospitals per 10,000 people	Health technicians per 1,000 people	Number of beds in medical and health institutions per 1,000 people	Total health expenditure as a percentage of GDP
Unit	year	‰	1/100000	‰	1/100000	%	%	%	day	%	pcs	person	pcs	%
Beijing	82.2	5.58	10.7	2.86	131.49	32.3	100	99.5	227	48.4	0.3	11.88	5.74	8.18
Tianjin	81.69	5.42	5.1	5.74	147.15	24.09	100	94	207	38	0.27	6.7	4.37	4.68
Hebei	76.4	6.38	8.8	3.11	172.71	11.3	99.7	74	208	41.6	0.28	6.1	5.58	6.41
Shanxi	74.9	5.32	14.2	5.7	237.88	12	99.7	55	207	41.3	0.37	6.63	5.6	7.5
Inner Mongolia	75.8	5.95	10.5	5.15	274.69	11.5	99.23	80	305	40.6	0.32	7.43	6.27	6.57
Liaoning	79	7.39	9.9	5.71	200.25	20.65	99.16	82	296	39.9	0.31	6.95	7.21	6.88
Jilin	76.7	6.26	15.4	5.51	132.5	13.5	93.89	83	330	37.6	0.29	6.8	6.18	6.6
Heilongjiang	77.52	6.67	23.2	5.12	164.99	12.9	98.48	80	341.2	36	0.29	6.12	6.63	8.6
Shanghai	83.63	5.4	1.4	2.38	175.04	28.38	100	99.5	296	36.2	0.15	8.07	5.74	7.1
Jiangsu	77.9	7.03	9.5	3.56	113.5	25.39	99.98	97.63	248	43.1	0.23	7.33	6.11	4.4
Zhejiang	78.8	5.58	4.1	3.55	181.83	23.03	100	98.55	353	41.2	0.22	8.47	5.79	5.6
Anhui	77.3	5.96	9.6	3.29	224.82	20.56	99.75	80	259	42.5	0.18	5.27	5.19	6.75
Fujian	77.8	6.2	8.8	3.76	256.8	17.25	99.69	95.5	356	44.3	0.16	6.28	4.88	4.38
Jiangxi	75.9	6.06	8.1	2.43	230.33	16.31	98.31	94	322	45.9	0.15	5.32	5.37	6.1
Shandong	78.66	7.18	9.5	3.69	157.38	18	99.4	93	220	41.8	0.26	7.35	6.06	5.3
Henan	76.2	6.8	11.5	3.72	193.9	14.38	96.65	80	207	40	0.19	6.47	6.34	6.13
Hubei	76.9	7	9.7	3.69	250.76	15.8	99.37	85	286	38.4	0.17	6.95	6.65	6.45
Hunan	76.7	7.08	10.4	4.6	278.42	18.8	96.35	85	312	41.2	0.22	6.33	6.99	6.31
Guangdong	77.2	4.55	6.5	4.22	310.94	15.4	97.3	96	324	44	0.14	6.66	4.56	5.3
Guangxi	77	5.96	10.5	5.82	281.24	11.74	97.8	95	334	39.9	0.13	6.51	5.2	6.93
Hainan	78	6.01	16.8	3.56	360.04	6.64	97.04	92.25	359	40.6	0.23	6.82	4.8	9.08
Chongqing	77.64	7.54	12.1	3.82	240.88	17.6	98.28	73.1	316	40.4	0.26	6.75	7.1	6.1
Sichuan	77.1	7.01	11.5	3.16	188.98	15.3	95.7	85	366	40.5	0.28	6.74	7.18	8.4
Guizhou	74.19	6.85	19.5	5.25	259.18	9.15	96.68	70	355	38.6	0.36	6.82	6.82	7.96
Yunnan	74.7	6.32	17.7	5.42	197.37	14.03	96.6	72	361	39.8	0.27	6.25	6.03	9.45
Tibet	70.6	4.58	56.5	14.67	358.09	2.16	85.9	0.5	358	37.3	0.46	5.55	4.88	10.9
Shannxi	75.7	6.24	6.4	3.52	186.31	11.3	95.49	58.7	243	38.8	0.3	8.49	6.57	7.2
Gansu	73.5	6.65	18.6	6.74	179.82	10.9	97.9	80	302	33.5	0.24	5.96	6.17	10.69
Qinghai	72.05	6.25	25.5	6.5	433.29	12.32	99	73	332	33.9	0.36	7.39	6.49	11.29
Ningxia	75.33	5.54	20.4	6.35	224.4	10.31	98.4	80	318	40.5	0.34	7.71	5.96	9.45
Xinjiang	72	4.56	27.8	11.01	659.75	11	97.66	67	266	39.6	0.36	7.09	7.19	10.3

## Sheet:  influencing factors
Table S2-1. The original data of the influencing factors that affect citizens’ health levels in 2002
The criteria layer	Economy			Society			Environment
The index layer	GDP per capita	Engel coefficient	Urban-rural income ratio	Average years of education	Urbanization rate	Family size	Wastewater discharge	Solid waste discharge	Exhaust emission
Unit	yuan	%	-	year	%	pearson	ten thousand tons	ten thousand tons	ten thousand tons
Beijing	28449	33.76	2.31	10.31	82.84	2.87	18044	1053	20.01
Tianjin	22380	36.25	2.18	9.21	73.35	3.07	21959	643	30.43
Hebei	9115	35.42	2.49	8.1	32.79	3.52	106772	8503	222.9
Shanxi	6146	32.51	2.9	8.3	38.09	3.61	30777	8295	221.75
Inner Mongolia	7241	31.53	2.9	8	42.71	3.14	22737	3044	95.18
Liaoning	12986	38.83	2.37	8.49	58.03	3.14	92001	8146	133.65
Jilin	8334	36.38	2.72	8.66	51.82	3.29	34783	1631	51.65
Heilongjiang	10184	35.51	2.54	8.36	51.9	3.22	47983	3086	68.98
Shanghai	40646	39.38	2.13	9.67	89.29	2.89	64857	1595	39.59
Jiangsu	14391	40.41	2.05	7.71	45.97	3.15	262715	3796	165.08
Zhejiang	16838	39.88	2.37	7.8	54.03	2.93	168048	1778	110.72
Anhui	5817	43.18	2.85	7.13	30.7	3.49	64577	3415	79.71
Fujian	13497	43.45	2.6	7.58	45.2	3.22	78511	4131	40.35
Jiangxi	5829	40.53	2.75	7.57	33.36	3.61	46119	5850	63.64
Shandong	11645	34.44	2.58	8.18	42.83	3.12	106668	6559	249.95
Henan	6436	33.68	2.82	8.15	25.07	3.6	114431	4251	211.29
Hubei	8319	37.22	2.78	7.47	41.65	3.28	98481	2977	107.77
Hunan	6565	35.62	2.9	7.98	31.8	3.44	111788	2434	155.14
Guangdong	15030	38.5	2.85	8.16	59.17	3.65	145236	2045	146.58
Guangxi	5099	40.67	3.63	7.71	29.11	3.67	97126	2535	152.69
Hainan	7803	44.62	2.82	8.02	42	4.23	7170	94	4.53
Chongqing	6347	38.03	3.45	7.53	40.35	3.35	79872	1348	86.58
Sichuan	5766	39.83	3.14	7.41	29.1	3.26	117638	4573	207.09
Guizhou	3153	38.9	3.99	6.89	24.63	3.66	17117	2879	108.06
Yunnan	5179	41.58	4.5	6.32	26.25	3.79	33696	3433	50.31
Tibet	6093	40.81	5.53	4.7	25.65	4.23	1063	8	0.37
Shannxi	5523	34.08	3.97	7.56	32.54	3.64	30496	2887	109.09
Gansu	4493	35.4	3.87	6.96	28.24	3.97	19677	1734	60.61
Qinghai	6426	36.7	3.7	6.57	37.22	4.11	3583	314	10.18
Ningxia	5804	34.76	3.16	7.54	39.37	3.76	11534	466	39.88
Xinjiang	8382	33.94	3.7	8.44	33.73	3.5	16426	1008	38.47
Table S2-2. The original data of the influencing factors that affect citizens’ health levels in 2003
The criteria layer	Economy			Society			Environment
The index layer	GDP per capita	Engel coefficient	Urban-rural income ratio	Average years of education	Urbanization rate	Family size	Wastewater discharge	Solid waste discharge	Exhaust emission
Unit	yuan	%	-	year	%	pearson	ten thousand tons	ten thousand tons	ten thousand tons
Beijing	32061	31.67	2.48	10.39	83.01	2.74	9134.25	1274.84	28.57
Tianjin	26532	37.67	2.26	9.31	73.93	3.08	21444.3	1399.4	38.4
Hebei	10513.2	35.16	2.54	8.44	34.6	3.46	123537	18688.3	277.64
Shanxi	7435	33.54	3.05	8.45	40.13	3.67	41140.3	13819.1	309.54
Inner Mongolia	8974.65	31.47	3.09	7.89	44.22	3.18	25020.8	10972.8	209.2
Liaoning	14257.8	39.4	2.47	8.97	58.24	3.1	95196.7	14341.8	175.79
Jilin	9338	35.65	2.77	8.74	52.01	3.27	39666.3	3112.56	67.6
Heilongjiang	11615.1	35.57	2.66	8.46	52.3	3.14	38388.3	4130.13	97.36
Shanghai	46718	37.16	2.23	10.18	89.29	2.81	47569.5	2165.4	58.27
Jiangsu	16809	38.26	2.18	7.82	47.27	3.18	268762	7354.22	207.85
Zhejiang	20147	36.64	2.45	7.88	54.73	2.92	201211	3613.45	130.74
Anhui	6455	44.21	3.19	7.78	32.3	3.38	73555.6	5960.35	115.67
Fujian	14979	42.21	2.68	7.7	45.9	3.26	136408	4814.86	57.28
Jiangxi	6678	40.29	2.81	8.36	34.48	3.44	71410.3	7777.28	96.7
Shandong	13661	33.8	2.67	7.97	43.48	3.08	166574	11934.7	322
Henan	7570.18	33.64	3.1	8.05	26.94	3.52	134344	8850.58	246.48
Hubei	9010.7	38.23	2.85	8.02	42.15	3.28	91001.1	4682.66	123.69
Hunan	7554	35.83	3.03	8.13	33.54	3.39	100113	4559.73	203.36
Guangdong	17213.1	37.19	3.05	8.07	59.31	3.83	246331	3852.43	174.24
Guangxi	5969	40.01	3.72	7.85	30.71	3.71	183981	4543.64	190.61
Hainan	8316	44.76	2.8	8.27	43.1	3.98	5960.12	157.93	4.69
Chongqing	7209	37.96	3.65	7.75	41.99	3.43	69002.8	2086.84	119.92
Sichuan	6418	38.91	3.16	7.52	30.4	3.32	114687	9653.82	250.61
Guizhou	3603	39.77	4.2	7.06	25.41	3.66	12101.1	5988.58	196.75
Yunnan	5662	41.61	4.5	6.23	27.35	3.94	35352.3	7097.52	74.48
Tibet	6871	44.04	5.18	4.32	25.74	4.89	856.48	5.49	0.3
Shannxi	6480	34.59	4.06	8.21	34.04	3.56	48522.8	5480.02	143.13
Gansu	5021.63	36.01	3.98	7.21	28.74	3.98	15856.3	3001.46	82.55
Qinghai	7277	36.79	3.76	6.93	38.03	3.91	7318.02	1129.27	17.85
Ningxia	6691	36.01	3.2	7.5	40.39	3.74	21089	1045.74	60.02
Xinjiang	9700	35.87	3.41	8.44	34.94	3.56	20959.5	2136.64	69.57
Table S2-3. The original data of the influencing factors that affect citizens’ health levels in 2004
The criteria layer	Economy			Society			Environment
The index layer	GDP per capita	Engel coefficient	Urban-rural income ratio	Average years of education	Urbanization rate	Family size	Wastewater discharge	Solid waste discharge	Exhaust emission
Unit	yuan	%	-	year	%	pearson	ten thousand tons	ten thousand tons	ten thousand tons
Beijing	37058	32.18	2.53	10.6	83.45	2.79	10170	1356	29.7
Tianjin	31550	37.24	2.28	9.7	74.53	3.1	22978	1292	33.1
Hebei	12918	36.82	2.51	8.44	35.88	3.49	130340	14229	287.6
Shanxi	9150	33.92	3.05	8.43	39.63	3.62	44091	11817	317.9
Inner Mongolia	11305	32.56	3.12	8.26	45.69	3.13	27823	8710	219.9
Liaoning	16297	40.41	2.42	8.88	58.49	3.13	94724	13013	175.4
Jilin	10932	35.92	2.61	8.84	52.33	3.24	39321	2802	73.2
Heilongjiang	13897	35.42	2.49	8.54	52.7	3.14	44801	3914	101.7
Shanghai	55307	36.37	2.36	10.17	89.09	2.86	48336	2063	60.9
Jiangsu	20705	39.98	2.2	7.92	48.81	3.15	287181	7195	200.8
Zhejiang	23942	36.21	2.45	8.07	55.32	2.97	199593	3096	136.6
Anhui	7768	43.93	3.01	7.61	33.9	3.36	70119	5028	120.6
Fujian	17218	41.59	2.73	7.63	46.6	3.18	127583	4238	61.1
Jiangxi	8189	43.02	2.71	8.06	35.88	3.5	64074	7393	109.2
Shandong	16925	34.62	2.69	8.06	44.35	3.04	144365	11011	279.5
Henan	9470	35.05	3.02	8.29	28.78	3.5	130158	7464	274.3
Hubei	10500	39.32	2.78	8.19	42.7	3.36	91146	4315	134.2
Hunan	9117	36.02	3.04	8.22	35.26	3.4	100024	3688	213
Guangdong	19707	36.96	3.12	8.19	60.54	3.8	234713	3057	180.3
Guangxi	7196	42.31	3.77	8.09	32.02	3.81	128932	3894	200.3
Hainan	9450	46.93	2.75	8.47	44.1	4.16	7351	147	4.5
Chongqing	9608	37.82	3.67	7.35	43.56	2.92	86496	1764	121.9
Sichuan	8113	40.19	3.06	7.56	31.7	3.34	115348	7600	256.8
Guizhou	4215	41.14	4.25	7.13	26.09	3.65	13928	5827	188.6
Yunnan	6733	42.35	4.76	6.96	28.4	3.72	34286	5972	78.5
Tibet	7779	45.56	4.89	4.77	26.56	4.8	790	9	0.3
Shannxi	7757	35.88	4.01	8.35	35.73	3.6	40479	4794	154.7
Gansu	5970	37.12	3.98	7.4	29.52	3.93	16570	2591	79.5
Qinghai	8606	35.7	3.74	7	38.44	3.88	7168	882	23.2
Ningxia	7880	37.04	3.11	7.84	41.26	3.67	18500	799	47.6
Xinjiang	11199	36.08	3.34	8.55	35.94	3.49	20558	1581	90.9
Table S2-4. The original data of the influencing factors that affect citizens’ health levels in 2005
The criteria layer	Economy			Society			Environment
The index layer	GDP per capita	Engel coefficient	Urban-rural income ratio	Average years of education	Urbanization rate	Family size	Wastewater discharge	Solid waste discharge	Exhaust emission
Unit	yuan	%	-	year	%	pearson	ten thousand tons	ten thousand tons	ten thousand tons
Beijing	45443.7	31.83	2.4	10.73	82.84	2.7	12813	1238	28.1
Tianjin	35783.2	36.7	2.27	9.56	73.35	2.92	30081	1123	37.5
Hebei	14782.3	34.57	2.62	8.24	32.79	3.32	124533	16279	294.1
Shanxi	12495	32.43	3.08	8.47	39.11	3.38	32099	11183	333.3
Inner Mongolia	16330.8	31.43	3.06	8.33	42.71	2.91	24967	7363	269.1
Liaoning	18983.2	38.82	2.47	8.79	58.03	2.92	105072	10242	239.5
Jilin	13348	34.67	2.66	8.53	51.82	3.14	41189	2457	93.3
Heilongjiang	14434.1	33.53	2.57	8.52	51.9	2.97	45158	3210	118
Shanghai	51474	35.87	2.26	10.08	89.29	2.65	51097	1964	64
Jiangsu	24560	37.18	2.33	8.24	45.97	2.91	296318	5757	218
Zhejiang	27702.7	33.79	2.45	7.73	54.03	2.73	192426	2514	130.3
Anhui	8675.14	43.68	3.21	7.2	30.7	3.02	63487	4196	133.1
Fujian	18645.8	40.88	2.77	7.66	45.2	2.99	130939	3773	78.5
Jiangxi	9440	40.84	2.75	7.63	33.36	3.29	53972	7007	120.9
Shandong	20096.5	33.69	2.73	7.84	42.83	2.9	139071	9175	299.4
Henan	11346.5	34.24	3.02	8.07	25.07	3.42	123476	6178	325.6
Hubei	11431	38.97	2.83	7.93	41.65	3.08	92432	3692	138.6
Hunan	10426	35.83	3.05	8.07	31.8	3.14	122440	3366	222.7
Guangdong	24435	36.12	3.15	8.42	59.17	3.4	231568	2896	189.4
Guangxi	8787.73	41.33	3.72	7.74	29.11	3.38	145609	3489	213
Hainan	10871	47.56	2.7	8.19	42	3.84	7428	127	4.4
Chongqing	10982	36.36	3.65	7.5	40.35	2.83	84885	1777	126.6
Sichuan	9060	39.32	2.99	6.99	29.1	2.95	122590	6421	247.5
Guizhou	5051.96	39.91	4.34	6.6	24.63	3.45	14850	4854	191.3
Yunnan	7835	42.83	4.54	6.56	26.25	3.59	32928	4661	90.4
Tibet	9114	44.45	4.54	4.19	25.65	5.03	991	8	0.6
Shannxi	9899	36.08	4.03	8.16	32.54	3.26	42819	4588	165.6
Gansu	7476.53	36.04	4.08	7.04	28.24	3.67	16798	2249	89.1
Qinghai	10044.7	36.31	3.75	6.98	37.22	3.67	7619	649	29.4
Ningxia	10239	34.8	3.23	7.54	39.37	3.58	21411	719	55.6
Xinjiang	13108	36.37	3.22	8.28	33.73	3.47	20052	1295	96.2
Table S2-5. The original data of the influencing factors that affect citizens’ health levels in 2006
The criteria layer	Economy			Society			Environment
The index layer	GDP per capita	Engel coefficient	Urban-rural income ratio	Average years of education	Urbanization rate	Family size	Wastewater discharge	Solid waste discharge	Exhaust emission
Unit	yuan	%	-	year	%	pearson	ten thousand tons	ten thousand tons	ten thousand tons
Beijing	50467	30.76	2.41	10.99	83.01	2.64	12617	1303	25.6
Tianjin	41163	34.89	2.29	9.77	73.93	2.96	22628	753	34.4
Hebei	16962	33.94	2.71	8.19	34.6	3.3	127386	16765	291.5
Shanxi	14123	31.41	3.15	8.74	40.13	3.4	31393	10167	318.2
Inner Mongolia	20053	30.31	3.1	8.28	44.22	3.01	22848	4702	248.7
Liaoning	21788	38.84	2.54	8.97	58.24	2.94	91810	8879	239.3
Jilin	15720	33.42	2.68	8.71	52.01	3.06	33568	2026	95.3
Heilongjiang	16195	33.29	2.58	8.58	52.3	2.99	45190	3170	118.2
Shanghai	57695	35.56	2.26	10.49	89.29	2.65	56359	1811	63.1
Jiangsu	28814	35.96	2.42	8.34	47.27	3	263538	4673	203.5
Zhejiang	31874	32.91	2.49	8.16	54.73	2.84	165274	2318	128.5
Anhui	10055	42.38	3.29	7.48	32.3	3.09	64054	3767	130.3
Fujian	21471	39.3	2.84	7.83	45.9	3.13	115228	3361	79
Jiangxi	10798	39.68	2.76	7.79	34.48	3.37	54949	6524	121.2
Shandong	23794	32.02	2.79	8.18	43.48	2.94	128706	7922	286.9
Henan	13313	33.14	3.01	8.14	26.94	3.38	117328	5140	298.4
Hubei	13296	38.78	2.87	8.35	42.15	3.09	97451	3266	139.4
Hunan	11950	34.9	3.1	8.23	33.54	3.11	123126	3269	215.9
Guangdong	28332	36.23	3.15	8.49	59.31	3.41	164728	2609	182.7
Guangxi	10296	42.07	3.57	8.09	30.71	3.52	122731	3291	191.3
Hainan	12654	43.47	2.89	8.25	43.1	3.93	6894	112	4.5
Chongqing	12457	36.34	4.03	7.66	41.99	2.98	83031	1489	127.4
Sichuan	10546	37.72	3.11	7.36	30.4	2.97	119223	5847	222.2
Guizhou	5787	38.68	4.59	6.76	25.41	3.57	16119	4560	188.2
Yunnan	8970	42.04	4.47	6.81	27.35	3.64	38402	4053	91.7
Tibet	10430	50.19	3.67	4.57	25.74	4.85	993	14	0.4
Shannxi	12138	34.28	4.1	8.39	34.04	3.24	36833	3820	163.3
Gansu	8757	34.53	4.18	6.97	28.74	3.72	18293	2139	86.6
Qinghai	11762	36.24	3.82	7.17	38.03	3.67	3544	508	29.1
Ningxia	11847	33.93	3.32	7.76	40.39	3.66	9510	645	58.4
Xinjiang	15000	35.47	3.24	8.36	34.94	3.61	17671	1129	100.5
Table S2-6. The original data of the influencing factors that affect citizens’ health levels in 2007
The criteria layer	Economy			Society			Environment
The index layer	GDP per capita	Engel coefficient	Urban-rural income ratio	Average years of education	Urbanization rate	Family size	Wastewater discharge	Solid waste discharge	Exhaust emission
Unit	yuan	%	-	year	%	pearson	ten thousand tons	ten thousand tons	ten thousand tons
Beijing	58204	32.18	2.33	11.12	83.45	2.65	13107	1186	21.95
Tianjin	46122	35.33	2.33	9.86	74.53	3	21605	644	32.79
Hebei	19877	33.88	2.72	8.23	35.88	3.3	108324	8975	264.77
Shanxi	16945	32.1	3.15	8.82	41.09	3.36	30929	9252	291.44
Inner Mongolia	25393	30.44	3.13	8.44	45.69	2.96	23577	3647	232.03
Liaoning	25729	37.76	2.58	9.03	58.49	2.91	89186	8250	236.29
Jilin	19383	33.21	2.69	8.82	52.33	3.04	31365	1736	89.13
Heilongjiang	18478	35.02	2.48	8.74	52.7	2.92	50286	3097	116.47
Shanghai	66367	35.5	2.33	10.5	89.09	2.65	61112	1659	61.22
Jiangsu	33928	36.67	2.5	8.51	48.81	2.99	247524	3894	185.83
Zhejiang	37411	34.72	2.49	8.2	55.32	2.84	168088	1976	118.23
Anhui	12045	39.67	3.23	7.39	33.9	3.04	63525	3522	118.49
Fujian	25908	38.86	2.84	7.85	46.6	3.1	98388	2981	75.06
Jiangxi	12633	40.87	2.83	8.31	35.88	3.42	50135	6182	115.33
Shandong	27807	32.9	2.86	8.31	44.35	2.94	115933	6786	258.91
Henan	16012	34.59	2.98	8.26	28.78	3.4	114224	4467	269.15
Hubei	16206	39.72	2.87	8.51	42.7	3.09	96498	3112	123.02
Hunan	14492	36.08	3.15	8.47	35.26	3.17	124132	2754	200.61
Guangdong	33151	35.27	3.15	8.72	60.54	3.39	148867	2246	172.68
Guangxi	12555	41.69	3.78	8.09	32.02	3.58	119291	3224	171.8
Hainan	14555	42.77	2.9	8.4	44.1	3.85	7181	91	4.65
Chongqing	14660	37.15	3.59	7.8	43.56	2.91	81973	1336	120.63
Sichuan	12893	41.19	3.13	7.53	31.7	3.03	120160	5145	183.24
Guizhou	6915	40.24	4.5	6.98	26.09	3.54	16815	3772	181.6
Yunnan	10540	44.97	4.36	6.93	28.4	3.65	34655	3418	88.15
Tibet	12109	50.94	3.99	4.96	26.56	4.7	612	6	0.41
Shannxi	14607	36.36	4.07	8.48	35.73	3.22	33526	2948	154.29
Gansu	10346	35.86	4.3	7.24	29.52	3.69	20899	2073	75.48
Qinghai	14257	37.32	3.83	7.35	38.44	3.65	3453	379	28.47
Ningxia	14649	35.32	3.41	7.94	41.26	3.64	10740	582	55.69
Xinjiang	16999	35.06	3.24	8.56	35.94	3.54	16417	1087	105.7
Table S2-7. The original data of the influencing factors that affect citizens’ health levels in 2008
The criteria layer	Economy			Society			Environment
The index layer	GDP per capita	Engel coefficient	Urban-rural income ratio	Average years of education	Urbanization rate	Family size	Wastewater discharge	Solid waste discharge	Exhaust emission
Unit	yuan	%	-	year	%	pearson	ten thousand tons	ten thousand tons	ten thousand tons
Beijing	61876.3	33.85	2.32	11	84.9	2.58	8367	1157	18.68
Tianjin	54033.8	39.15	2.46	9.92	77.23	3.02	20433	1479	31.77
Hebei	23163.6	36.45	2.8	8.41	41.9	3.32	121172	19769	242.07
Shanxi	20344.5	36.37	3.2	8.85	45.11	3.32	41150	16213	251.13
Inner Mongolia	32156.9	36.91	3.1	8.45	51.71	2.97	29167	10622	221.95
Liaoning	31199.3	39.8	2.58	9.12	60.05	2.84	83073	15841	209.02
Jilin	23496.9	36.78	2.6	8.94	53.21	3.03	38353	3415	81.98
Heilongjiang	21723.3	34.62	2.39	8.74	55.4	2.84	38910	4472	109.47
Shanghai	72536.1	38.78	2.33	10.59	88.6	2.61	41871	2347	56.04
Jiangsu	39483.4	39.64	2.54	8.52	54.3	3.02	259999	7724	167.03
Zhejiang	41966.6	36.66	2.45	8.33	57.6	2.81	200488	3785	108.65
Anhui	14464.8	42.64	3.09	7.57	40.5	3.04	67007	7569	116.9
Fujian	30030.8	43.5	2.9	7.9	49.9	3.05	139997	5371	71.71
Jiangxi	14728	45.51	2.74	8.32	41.36	3.53	68681	8190	106.68
Shandong	32994.9	35.84	2.89	8.35	47.6	2.96	176977	12988	239.72
Henan	19522.5	36.57	2.97	8.41	36.03	3.39	133144	9557	235.23
Hubei	19839.6	44.51	2.82	8.56	45.2	3.08	93687	5014	111.59
Hunan	17486.9	45.55	3.06	8.49	42.15	3.23	92340	4520	177.25
Guangdong	37402	43.41	3.08	8.81	63.37	3.41	213314	4833	166.26
Guangxi	14891.1	47.92	3.83	8.04	38.16	3.55	205745	5417	158.68
Hainan	17087	49.13	2.87	8.42	48	3.75	5991	220	4.02
Chongqing	17952.3	46.47	3.48	7.86	49.99	2.88	67027	2311	112
Sichuan	15367.7	48	3.07	7.61	37.4	3.03	108700	9237	161.38
Guizhou	8788.92	47.4	4.2	7.17	29.11	3.6	11695	5844	169.08
Yunnan	12547	48.33	4.27	7.02	33	3.63	32996	7986	82.84
Tibet	13794.8	51.82	3.93	5.05	22.61	4.6	924	6	0.43
Shannxi	18211.9	37.07	4.1	8.59	42.1	3.19	48477	6121	137.4
Gansu	12085.1	42.74	4.03	7.32	32.15	3.6	16405	3199	72.38
Qinghai	17346.7	41.3	3.8	7.41	40.86	3.67	7098	1337	28.79
Ningxia	17784.2	38.36	3.51	8.22	44.98	3.57	20448	1143	50.02
Xinjiang	19726.9	39.96	3.26	8.6	39.64	3.53	22875	2438	107.64
Table S2-8. The original data of the influencing factors that affect citizens’ health levels in 2009
The criteria layer	Economy			Society			Environment
The index layer	GDP per capita	Engel coefficient	Urban-rural income ratio	Average years of education	Urbanization rate	Family size	Wastewater discharge	Solid waste discharge	Exhaust emission
Unit	yuan	%	-	year	%	pearson	ten thousand tons	ten thousand tons	ten thousand tons
Beijing	65338.9	32.37	2.29	11.2	85	2.53	8712.53	1242.44	18.05
Tianjin	61252.8	39.88	2.46	10.09	78.01	2.96	19441	1515.67	31.6
Hebei	24503.1	34.64	2.86	8.48	43.74	3.29	110058	21975.8	219.91
Shanxi	21471.6	34.95	3.3	8.92	45.99	3.26	39720.2	14742.9	234.3
Inner Mongolia	39626.7	35.14	3.21	8.57	53.4	2.91	28616.2	12108.3	205.67
Liaoning	35043.8	37.36	2.65	9.27	60.35	2.86	75158.6	17221.4	189.1
Jilin	26564.8	34.23	2.66	8.94	53.32	3.08	37563.5	3940.52	81.3
Heilongjiang	22443.8	33.33	2.41	8.79	55.5	2.88	34188.2	5274.72	102.44
Shanghai	68083.5	36.05	2.31	10.69	88.6	2.59	41192	2254.59	48.9
Jiangsu	44119.5	37.75	2.57	8.62	55.6	2.98	256160	8027.81	156.8
Zhejiang	43575.3	34.98	2.46	8.48	57.9	2.8	203442	3909.66	105.92
Anhui	16413	40.23	3.13	7.74	42.1	3.04	73441.5	8470.83	110.32
Fujian	33378.4	42.81	2.93	8.43	55.1	2.96	142747	6348.91	68.96
Jiangxi	17272.5	42.7	2.76	8.57	43.18	3.64	67192.4	8898.18	99.18
Shandong	35793.7	34.78	2.91	8.39	48.32	2.98	182673	14138	222.81
Henan	20533.8	35.11	2.99	8.46	37.7	3.34	140325	10785.8	220.12
Hubei	22659.3	42.6	2.85	8.57	46	3.08	91324.1	5561.45	104.35
Hunan	20386.7	43.74	3.07	8.52	43.2	3.29	96395.7	5092.79	172.77
Guangdong	38975.9	42.62	3.12	8.91	63.4	3.3	188844	4740.85	147.7
Guangxi	15978.5	44.28	3.88	8.15	39.2	3.57	161596	5693.1	161.68
Hainan	19146	48.88	2.9	8.51	49.13	3.75	7031.3	200.86	4.01
Chongqing	22840.2	43.38	3.52	8	51.59	2.75	65683.9	2551.85	104.44
Sichuan	17289.3	41.23	3.1	7.79	38.7	3.01	105910	8596.86	153.39
Guizhou	11062.1	43.34	4.28	7.2	29.89	3.61	13477.6	7317.37	171.4
Yunnan	13497.6	45.97	4.28	7.03	34	3.58	32375.2	8672.83	77.94
Tibet	14910.8	50.15	3.84	4.92	22.3	4.71	941.55	11.12	0.52
Shannxi	21920.6	36.17	4.11	8.66	43.5	3.16	49136.8	5546.67	115.47
Gansu	13258.5	39.53	4	7.44	34.89	3.58	16363.6	3150.21	74.58
Qinghai	19412.4	38.33	3.79	7.59	41.9	3.58	8403.91	1347.62	28.07
Ningxia	21653	37.53	3.46	8.31	46.1	3.47	21542.4	1398.25	44.84
Xinjiang	19810.3	38.93	3.16	8.7	39.85	3.49	24200.7	3206.08	109.12
Table S2-9. The original data of the influencing factors that affect citizens’ health levels in 2010
The criteria layer	Economy			Society			Environment
The index layer	GDP per capita	Engel coefficient	Urban-rural income ratio	Average years of education	Urbanization rate	Family size	Wastewater discharge	Solid waste discharge	Exhaust emission
Unit	yuan	%	-	year	%	pearson	ten thousand tons	ten thousand tons	ten thousand tons
Beijing	71938.3	32.21	2.19	11.97	85.96	2.45	8198	1269	18.04
Tianjin	70996.2	38.81	2.41	10.28	79.55	2.8	19680	1862	30.77
Hebei	28350.6	33.74	2.73	8.41	44.5	3.36	114232	31688	205.44
Shanxi	25743	34.32	3.3	8.94	48.05	3.24	49881	18270	223.51
Inner Mongolia	47213.4	33.82	3.2	8.85	55.5	2.82	39536	16996	220.14
Liaoning	42189	36.63	2.56	9.43	62.1	2.78	71521	17273	182.28
Jilin	31557.5	34.5	2.47	9.15	53.35	2.94	38656	4642	71.01
Heilongjiang	27048	34.61	2.23	9.04	55.66	2.85	38921	5405	96.89
Shanghai	74548.4	35.4	2.28	10.81	89.3	2.49	36696	2448	46.99
Jiangsu	52641.6	37.3	2.52	8.96	60.58	2.94	263760	9064	153.69
Zhejiang	50899.2	34.24	2.42	8.49	61.62	2.62	217426	4268	99.2
Anhui	20748.6	39.32	2.99	7.75	43.01	3.09	70971	9158	105.12
Fujian	39905.6	42.7	2.93	8.48	57.1	2.98	124168	7487	68.78
Jiangxi	21180.5	42.92	2.67	8.01	44.06	3.67	72526	9407	94.5
Shandong	40853.7	34.8	2.85	8.48	49.7	2.98	208257	16038	211.89
Henan	24552	35.11	2.88	8.11	38.5	3.47	150406	10714	211.22
Hubei	27876.8	40.89	2.75	8.79	49.7	3.16	94593	6813	97.22
Hunan	24410.5	42.49	2.95	8.48	43.3	3.32	95605	5773	150.79
Guangdong	44069.7	42.09	3.03	8.87	66.18	3.2	187031	5456	146.59
Guangxi	20758.9	43.27	3.76	7.88	40	3.34	165211	6232	148.31
Hainan	23769.5	47.42	2.95	8.4	49.8	3.63	5782	212	4.35
Chongqing	27475.3	42.94	3.32	8.27	53.02	2.77	45180	2837	101.07
Sichuan	21361.9	43.88	3.04	7.89	40.18	2.95	93444	11239	161.35
Guizhou	13228.6	43.08	4.07	7.01	33.81	3.24	14130	8188	148.73
Yunnan	15699.3	44.35	4.06	7.24	34.7	3.53	30926	9392	73.07
Tibet	16874.7	49.88	3.62	5.17	22.67	4.23	736	11	0.71
Shannxi	27102.7	35.65	3.82	8.95	45.76	3.22	45487	6892	112.73
Gansu	16096.8	41.06	3.85	7.8	36.12	3.49	15352	3745	80.75
Qinghai	23986.3	38.8	3.59	7.39	44.72	3.46	9031	1783	31.75
Ningxia	26694.4	35.83	3.28	8.11	47.9	3.25	21977	2465	54.35
Xinjiang	24884.2	38.28	2.94	8.49	43.01	3.26	25413	3914	111.71
Table S2-10. The original data of the influencing factors that affect citizens’ health levels in 2011
The criteria layer	Economy			Society			Environment
The index layer	GDP per capita	Engel coefficient	Urban-rural income ratio	Average years of education	Urbanization rate	Family size	Wastewater discharge	Solid waste discharge	Exhaust emission
Unit	yuan	%	-	year	%	pearson	ten thousand tons	ten thousand tons	ten thousand tons
Beijing	81658	31.92	2.23	11.57	86.2	2.42	145469	1125.59	35.2
Tianjin	85213	35.75	2.18	10.43	80.5	2.73	67147	1752.22	66.57
Hebei	33969	33.68	2.57	8.71	45.6	3.33	278551	45128.5	453.57
Shanxi	31357	34.52	3.24	9.19	49.68	3.22	116132	27555.9	381.5
Inner Mongolia	57974	34.39	3.07	9.27	56.62	2.73	100389	23584.1	357.12
Liaoning	50760	37.34	2.47	9.49	64.05	2.72	232247	28269.6	288.22
Jilin	38460	33.99	2.37	9.13	53.4	2.91	116162	5378.59	145.01
Heilongjiang	32819	37.47	2.07	9.14	56.5	2.81	150661	6016.68	196.16
Shanghai	82560	38.18	2.26	10.51	89.3	2.33	214155	2442.2	76.53
Jiangsu	62290	35.6	2.44	9.22	61.9	2.92	592774	10475.5	311.69
Zhejiang	59249	35.93	2.37	8.89	62.3	2.59	420134	4445.75	184.44
Anhui	25659	40.63	2.99	8.33	44.8	3.03	243265	11473.2	194.08
Fujian	47377	42.79	2.84	8.88	58.1	2.78	316178	4414.89	110.9
Jiangxi	26150	42.5	2.54	8.78	45.7	3.44	194432	11372.4	159.24
Shandong	47335	34.43	2.73	8.74	50.95	2.9	443331	19532.6	440.15
Henan	28661	35.13	2.76	8.76	40.57	3.39	378785	14573.8	370.41
Hubei	34197	39.88	2.66	9.11	51.83	3.06	293064	7595.79	168.13
Hunan	29880	41.06	2.87	8.85	45.1	3.05	278811	8486.74	173.63
Guangdong	50807	42.99	2.87	9.37	66.5	3.33	785587	5848.91	256.02
Guangxi	25326	41.65	3.6	8.66	41.8	3.15	222439	7438.11	130.33
Hainan	28898	48.1	2.85	8.93	50.5	3.54	35725	420.76	14.38
Chongqing	34500	42.94	3.12	8.83	55.02	2.78	131450	3299.18	117.05
Sichuan	26133	43.46	2.92	8.29	41.83	2.83	279852	12684.5	196.28
Guizhou	16413	43.93	3.98	7.7	34.96	3.11	77927	7598.24	196.1
Yunnan	19265	43.15	3.93	7.77	36.8	3.31	147523	17335.3	162.19
Tibet	20077	50.18	3.3	5.81	22.71	4.21	4635	301.39	5.48
Shannxi	33464	33.26	3.63	9.01	47.3	3.16	121815	7117.63	221.19
Gansu	19595	39.81	3.83	8.25	37.15	3.24	59232	6523.79	134.1
Qinghai	29522	38.36	3.39	7.9	46.22	3.49	21292	12017.2	41.9
Ningxia	33043	36.03	3.25	8.47	49.82	3.3	39432	3344.12	108.41
Xinjiang	30087	37.23	2.85	9.22	43.54	3.2	83329	5219.09	205.01
Table S2-11. The original data of the influencing factors that affect citizens’ health levels in 2012
The criteria layer	Economy			Society			Environment
The index layer	GDP per capita	Engel coefficient	Urban-rural income ratio	Average years of education	Urbanization rate	Family size	Wastewater discharge	Solid waste discharge	Exhaust emission
Unit	yuan	%	-	year	%	pearson	ten thousand tons	ten thousand tons	ten thousand tons
Beijing	87475	33.21	2.21	11.85	86.2	2.53	140274	1104.05	33.81
Tianjin	93173	36.22	2.11	10.54	81.55	2.76	82813	1820	64.28
Hebei	36584	33.87	2.54	8.75	46.8	3.26	305773	45575.8	433.82
Shanxi	33628	33.42	3.21	9.41	51.26	3.06	134298	29031.5	361.67
Inner Mongolia	63886	37.29	3.04	9.27	57.74	2.78	102424	24225.6	363.68
Liaoning	56649	38.34	2.47	9.92	65.65	2.69	238769	27279.7	282.13
Jilin	43415	36.67	2.35	9.28	53.7	2.88	119509	4730.89	124.42
Heilongjiang	35711	37.86	2.06	9.24	56.9	2.77	162589	6312.55	199.42
Shanghai	85373	40.49	2.26	10.68	89.3	2.35	219244	2198.81	71.69
Jiangsu	68347	33.37	2.43	9.32	63	2.97	598211	10224.4	291.48
Zhejiang	63374	37.05	2.37	9.27	63.2	2.68	420961	4461.42	168.86
Anhui	28792	39.25	2.94	8.6	46.5	3.02	254329	12022.3	190.3
Fujian	52763	45.98	2.81	8.62	59.6	2.82	256263	7719.54	109.11
Jiangxi	28800	43.53	2.54	8.91	47.51	3.43	201190	11133.6	150.22
Shandong	51768	34.26	2.73	8.84	52.43	2.91	479100	18342.6	418.31
Henan	31499	33.82	2.72	8.72	42.43	3.37	403668	15250.5	350.16
Hubei	38572	37.61	2.65	9.26	53.5	3.03	290200	7610.94	161.21
Hunan	33480	43.86	2.87	8.77	46.65	3.07	304214	8115.92	159.29
Guangdong	54095	49.05	2.87	9.38	67.4	3.26	838551	5965.49	243.09
Guangxi	27952	42.27	3.54	8.46	43.53	3.32	245578	7963.96	130.21
Hainan	32377	50.46	2.82	9.19	51.6	3.64	37103	385.72	15.41
Chongqing	38914	44.16	3.11	8.69	56.98	2.67	132430	3114.89	112.98
Sichuan	29608	46.85	2.9	8.55	43.53	2.85	283657	13187.3	181.92
Guizhou	19710	44.61	3.93	7.74	36.41	3.1	91455	7835.25	189.91
Yunnan	22195	45.61	3.89	6.85	39.31	3.26	154010	16037.6	160.71
Tibet	22936	53.65	3.15	5.41	22.75	4.07	4683	365.98	5.51
Shannxi	38564	29.72	3.6	9.19	50.02	3.07	128749	7215.11	211.4
Gansu	21978	39.76	3.81	8.37	38.75	3.22	62813	6671.17	125.35
Qinghai	33181	34.81	3.27	7.75	47.44	3.4	21994	12301.2	43.64
Ningxia	36394	35.34	3.21	8.44	50.67	3.35	38948	2960.67	106.03
Xinjiang	33796	35.67	2.8	9.09	43.98	3.16	93810	7879.72	231.17
Table S2-12. The original data of the influencing factors that affect citizens’ health levels in 2013
The criteria layer	Economy			Society			Environment
The index layer	GDP per capita	Engel coefficient	Urban-rural income ratio	Average years of education	Urbanization rate	Family size	Wastewater discharge	Solid waste discharge	Exhaust emission
Unit	yuan	%	-	year	%	pearson	ten thousand tons	ten thousand tons	ten thousand tons
Beijing	94648	34.65	2.61	12.05	86.3	2.61	144580	1044.12	31.26
Tianjin	100105	34.86	1.89	10.56	82.01	2.67	84210	1592.11	61.6
Hebei	38909	32.01	2.42	8.94	48.12	3.17	310921	43288.8	425.05
Shanxi	34984	33.04	2.8	9.38	52.56	3.01	138030	30520.5	343.99
Inner Mongolia	67836	35.54	2.89	9.06	58.71	2.74	106920	20080.6	355.84
Liaoning	61996	35.19	2.63	10.13	66.45	2.72	234508	26759.5	265.3
Jilin	47428	33.04	2.18	9.43	54.2	2.77	117703	4591.13	126.22
Heilongjiang	37697	35.19	2.23	9.51	57.4	2.74	153090	6094.49	196.32
Shanghai	90993	37.48	2.34	10.6	89.6	2.35	222963	2054.49	67.71
Jiangsu	75354	33.13	2.34	9.47	64.11	2.95	594359	10855.9	277.97
Zhejiang	68805	35.64	2.12	9.42	64	2.54	419120	4299.58	166.61
Anhui	32001	39.65	2.58	8.6	47.86	3.03	266234	11936.7	94.64
Fujian	58145	44.18	2.47	8.71	60.77	2.72	259098	8535.17	105.87
Jiangxi	31930	42.26	2.43	9.27	48.87	3.42	207138	11518.2	148.44
Shandong	56885	34.54	2.52	8.98	53.75	2.8	494570	18172.4	399.3
Henan	34211	34.45	2.42	8.84	43.8	3.28	412582	16270.1	346.09
Hubei	42826	36.76	2.34	9.4	54.51	2.94	294054	8180.61	157.13
Hunan	36943	38.38	2.7	8.99	47.96	3.25	307227	7805.68	158.82
Guangdong	58833	44.78	2.67	9.26	67.76	3.15	862471	5911.84	232.01
Guangxi	30741	40.05	2.91	8.63	44.81	3.31	225303	7675.64	126.58
Hainan	35663	48.03	2.55	9.24	52.74	3.52	36156	414.89	15.06
Chongqing	43223	43.8	2.72	8.73	58.34	2.66	142535	3161.8	110.09
Sichuan	32617	42.24	2.65	8.52	44.9	2.76	307648	14006.6	173.7
Guizhou	23151	42.96	3.49	8.14	37.83	3.07	93085	8194.05	184.5
Yunnan	25322	44.22	3.34	7.93	40.48	3.28	156583	16040	157.37
Tibet	26326	54.25	3.11	4.78	23.71	4.05	5005	361.52	5.53
Shannxi	43117	31.82	3.15	9.33	51.31	3.05	132169	7491.1	210.28
Gansu	24539	37.09	3.56	8.42	40.13	3.35	64969	5907.22	123.15
Qinghai	36875	30.89	3.15	8.1	48.51	3.37	21953	12377.4	46.28
Ningxia	39613	31.15	2.83	8.78	52.01	3.2	38528	3276.85	105.77
Xinjiang	37553	33.86	2.69	9.03	44.47	3.3	100720	9283.05	247.22
Table S2-13. The original data of the influencing factors that affect citizens’ health levels in 2014
The criteria layer	Economy			Society			Environment
The index layer	GDP per capita	Engel coefficient	Urban-rural income ratio	Average years of education	Urbanization rate	Family size	Wastewater discharge	Solid waste discharge	Exhaust emission
Unit	yuan	%	-	year	%	pearson	ten thousand tons	ten thousand tons	ten thousand tons
Beijing	99995	24.01	2.57	11.87	86.35	2.49	150714	1020.76	28.73
Tianjin	105231	33.02	1.85	10.54	82.27	2.62	89361	1734.62	63.1
Hebei	39984	27.35	2.37	8.91	49.33	3.2	309824	41927.6	450.01
Shanxi	35070	27.07	2.73	9.33	53.79	3.06	145033	30198.7	378.49
Inner Mongolia	71046	29.19	2.84	9.05	59.51	2.68	111917	23191.3	359.22
Liaoning	65201	28.35	2.6	9.93	67.05	2.63	262879	28666.3	301.73
Jilin	50160	27.11	2.15	9.41	54.81	2.72	122171	4944.11	139.66
Heilongjiang	39226	27.71	2.16	9.39	58.01	2.67	149644	6312.27	199.63
Shanghai	97370	27.25	2.3	10.85	89.6	2.34	221160	1924.79	66.26
Jiangsu	81874	29.18	2.3	9.4	65.21	2.96	601158	10924.7	290.1
Zhejiang	73002	29.13	2.08	9.12	64.87	2.54	418262	4541.72	164.16
Anhui	34425	34.14	2.5	8.8	49.15	3.08	272313	12000	195.31
Fujian	63472	34.47	2.43	8.86	61.8	2.69	260579	4834.9	113.56
Jiangxi	34674	34.14	2.4	8.91	50.22	3.41	208289	10821.2	153.68
Shandong	60879	29.5	2.46	9.04	55.01	2.84	514423	19199.4	439.16
Henan	37072	29.11	2.38	9.05	45.2	3.34	422832	15917.4	350.23
Hubei	47145	32.02	2.29	9.17	55.67	2.96	301704	8006.35	166.8
Hunan	40271	31.91	2.64	9.06	49.28	3.18	309960	6933.77	167.27
Guangdong	63469	34.31	2.63	9.32	68	3.19	905082	5665.09	230.17
Guangxi	33090	35.82	2.84	8.79	46.01	3.23	219304	8037.55	131.19
Hainan	38924	39.41	2.47	9.15	53.76	3.59	39351	515.42	15.08
Chongqing	47850	36	2.65	9.01	59.6	2.72	145822	3067.78	110.8
Sichuan	35128	36.77	2.59	8.42	46.3	2.69	331277	14246.4	181.04
Guizhou	26437	33.88	3.38	8.2	40.01	3.09	110912	7394.22	179.48
Yunnan	27264	32.54	3.26	7.87	41.73	3.3	157544	14480.6	150.24
Tibet	29252	46.06	2.99	4.67	25.75	4.08	5450	383.09	6.64
Shannxi	46929	27.9	3.07	9.2	52.57	3.07	145785	8682.5	219.59
Gansu	26433	32.59	3.47	8.41	41.68	3.35	65973	6140.54	133.98
Qinghai	39671	30.58	3.06	8.17	49.78	3.19	23001	12423.3	52.87
Ningxia	41834	28.48	2.77	8.63	53.61	3.2	37277	3693.91	102.03
Xinjiang	40648	32.38	2.66	9.22	46.07	3.2	102748	7789.67	252.97
Table S2-14. The original data of the influencing factors that affect citizens’ health levels in 2015
The criteria layer	Economy			Society			Environment
The index layer	GDP per capita	Engel coefficient	Urban-rural income ratio	Average years of education	Urbanization rate	Family size	Wastewater discharge	Solid waste discharge	Exhaust emission
Unit	yuan	%	-	year	%	pearson	ten thousand tons	ten thousand tons	ten thousand tons
Beijing	106497	22.44	2.57	16.91	86.5	2.54	151733	710	25.82
Tianjin	107960	31.91	1.85	11.88	82.64	2.78	93008	1546	53.34
Hebei	40255	26.98	2.37	9.08	51.33	3.24	310568	35372	403.46
Shanxi	34919	26.34	2.73	9.7	55.03	3.08	145252	31794	350.03
Inner Mongolia	71101	28.64	2.84	9.45	60.3	2.73	110861	26669	324.87
Liaoning	65354	28.24	2.58	9.79	67.35	2.77	260045	32434	279.69
Jilin	51086	26.76	2.2	9.52	55.31	2.92	126908	5385	131.19
Heilongjiang	39462	27.64	2.18	9.4	58.8	2.79	148595	7495	174.52
Shanghai	103796	26.65	2.28	10.63	87.6	2.46	224147	1868	59.21
Jiangsu	87995	28.88	2.29	9.5	66.52	3.09	621303	10701	255.72
Zhejiang	77644	28.92	2.07	9.22	65.8	2.69	433822	4486	147.57
Anhui	35997	34.46	2.49	8.87	50.5	3.25	280626	13059	174.7
Fujian	67966	34.16	2.41	8.96	62.6	3.1	256868	4956	105.86
Jiangxi	36724	33.71	2.38	8.94	51.62	3.57	223232	10777	150.14
Shandong	64168	28.58	2.44	9.05	57.01	2.88	559908	19798	403.21
Henan	39123	28.51	2.36	8.92	46.85	3.39	433487	14722	325.28
Hubei	50654	31.43	2.28	9.34	56.85	3.05	313785	7750	151.29
Hunan	42754	31.79	2.62	9.39	50.89	3.28	314107	7126	154.69
Guangdong	67503	34.5	2.6	9.5	68.71	3.23	911523	5609	202.3
Guangxi	35190	34.74	2.79	8.84	47.06	3.51	220066	6977	115.05
Hainan	40818	39.51	2.43	9.38	55.12	3.65	39123	422	14.22
Chongqing	52321	35.18	2.59	8.94	60.94	2.85	149799	2828	102.56
Sichuan	36775	36.69	2.56	8.51	47.69	3.02	341607	12316	165.61
Guizhou	29847	32.42	3.33	7.99	42.01	3.38	112803	7055	155.77
Yunnan	28806	32.6	3.2	8.08	43.33	3.49	173333	14109	134.57
Tibet	31999	47.54	3.09	6.67	27.74	4.13	5883	400	7.52
Shannxi	47626	27.86	3.04	9.36	53.92	3.14	168122	9330	196.6
Gansu	26165	31.48	3.43	8.86	43.19	3.53	67072	5824	125.33
Qinghai	41252	29.08	3.09	7.84	50.3	3.46	23663	14868	51.47
Ningxia	43805	26.74	2.76	8.99	55.23	3.21	32025	3430	95.51
Xinjiang	40036	31.81	2.79	9.09	47.23	3.29	99952	7263	211.07
Table S2-15. The original data of the influencing factors that affect citizens’ health levels in 2016
The criteria layer	Economy			Society			Environment
The index layer	GDP per capita	Engel coefficient	Urban-rural income ratio	Average years of education	Urbanization rate	Family size	Wastewater discharge	Solid waste discharge	Exhaust emission
Unit	yuan	%	-	year	%	pearson	ten thousand tons	ten thousand tons	ten thousand tons
Beijing	118198	21.48	2.57	12.32	86.5	2.62	166419	629	16.38
Tianjin	115053	30.7	1.85	10.8	82.93	2.77	91534	1490	29.34
Hebei	43062	26.81	2.37	9.02	53.32	3.26	288795	33236	317.28
Shanxi	35532	24.43	2.71	9.73	56.21	3.11	139291	28845	204.07
Inner Mongolia	72064	28.6	2.84	9.73	61.19	2.73	104696	24762	187
Liaoning	50791	27.49	2.55	9.99	67.37	2.74	228202	22822	177.21
Jilin	53868	26.73	2.19	9.54	55.97	2.85	97073	4006	70.75
Heilongjiang	40432	27.67	2.18	9.42	59.2	2.75	138335	6940	132.5
Shanghai	116562	25.53	2.26	11.08	87.9	2.47	220759	1680	32
Jiangsu	96887	28.31	2.28	9.57	67.72	3.18	616624	11649	197.21
Zhejiang	84916	29.04	2.07	9.18	67	2.68	430857	4263	83.11
Anhui	39561	33.17	2.49	8.64	51.99	3.32	240666	12653	111.05
Fujian	74707	34.25	2.4	8.79	63.6	3.05	237016	4449	68.9
Jiangxi	40400	33.19	2.36	8.8	53.1	3.64	221092	12665	102.93
Shandong	68733	28.19	2.44	9.1	59.02	2.87	507591	22510	323.77
Henan	42575	28.2	2.33	8.87	48.5	3.48	402055	14256	165.08
Hubei	55665	31.01	2.31	9.36	58.1	3.11	274787	8193	95.28
Hunan	46382	30.55	2.62	9.4	52.75	3.24	298757	5320	102.95
Guangdong	74016	34.18	2.6	9.65	69.2	3.1	938261	5610	147.81
Guangxi	38027	34.42	2.73	8.81	48.08	3.55	193186	6938	76.59
Hainan	44347	40.25	2.4	9.17	56.78	3.78	44097	330	9.98
Chongqing	58502	34.25	2.56	9.12	62.6	2.75	202061	2344	60.18
Sichuan	40003	35.86	2.53	8.39	49.21	3.02	352826	11765	121.2
Guizhou	33246	31.08	3.31	7.88	44.15	3.33	100720	7753	122.93
Yunnan	31093	31.8	3.17	8.08	45.03	3.55	181089	13122	122.07
Tibet	35184	48.62	3.06	5.48	29.56	4.03	6143	426	7.71
Shannxi	51015	27.66	3.03	9.33	55.34	3.23	166565	8648	98.57
Gansu	27643	30.2	3.45	8.53	44.69	3.45	66325	5091	71.03
Qinghai	43531	28.91	3.09	7.93	51.63	3.36	27275	14669	35.65
Ningxia	47194	24.73	2.76	9.22	56.29	3.17	33949	3618	63.59
Xinjiang	40564	29.95	2.8	9.14	48.35	3.33	93907	8530	153.72
Table S2-16. The original data of the influencing factors that affect citizens’ health levels in 2017
The criteria layer	Economy			Society			Environment
The index layer	GDP per capita	Engel coefficient	Urban-rural income ratio	Average years of education	Urbanization rate	Family size	Wastewater discharge	Solid waste discharge	Exhaust emission
Unit	yuan	%	-	year	%	pearson	ten thousand tons	ten thousand tons	ten thousand tons
Beijing	128994	20.17	2.57	12.52	86.5	2.62	133188	630	18.5
Tianjin	118944	31.06	1.85	11.12	82.93	2.74	90790	1495	26.31
Hebei	45387	25.35	2.37	9.18	55.01	3.21	253685	32721	246.21
Shanxi	42060	24.33	2.7	9.95	57.34	2.97	135057	34162	152.79
Inner Mongolia	63764	27.48	2.83	9.67	62.02	2.67	104251	27953	158.8
Liaoning	53527	27.39	2.55	10.01	67.49	2.65	237971	27466	155.23
Jilin	54838	26.51	2.19	9.6	56.65	2.66	121464	5143	61.72
Heilongjiang	41916	27.02	2.17	9.46	59.4	2.61	138121	7070	110.55
Shanghai	126634	25.15	2.25	11.46	87.7	2.49	211951	1630	25.94
Jiangsu	107150	27.8	2.28	9.58	68.76	3.09	575196	12002	170.87
Zhejiang	92057	28.62	2.05	9.25	68	2.62	453935	4485	77.59
Anhui	43401	32.65	2.48	8.68	53.49	3.18	233838	12002	100.62
Fujian	82677	33.94	2.39	9.2	64.8	3.03	238279	5462	58.13
Jiangxi	43424	31.99	2.36	8.81	54.6	3.56	189362	12341	85.04
Shandong	72807	27.29	2.43	9.19	60.58	2.82	499884	23925	244.73
Henan	46674	26.85	2.32	8.99	50.16	3.34	409107	15685	117.26
Hubei	60199	30.1	2.31	9.46	59.3	3.02	272694	8112	78.48
Hunan	49558	29.16	2.62	9.49	54.62	3.21	300563	4354	78.64
Guangdong	80932	33.51	2.6	9.8	69.85	3.05	882020	6340	136.73
Guangxi	38102	32.85	2.69	8.8	49.21	3.51	198144	6503	73.2
Hainan	48430	38.54	2.39	9.52	58.04	3.58	44081	437	9.53
Chongqing	63442	33.21	2.55	9.23	64.08	2.78	200677	1943	54.07
Sichuan	44651	34.81	2.51	8.63	50.79	2.95	362438	13756	107.07
Guizhou	37956	30.49	3.28	8.24	46.02	3.4	118017	9353	124.4
Yunnan	34221	30.32	3.14	8.25	46.69	3.53	185112	13725	87.74
Tibet	39267	46.4	2.97	5.97	30.89	3.98	7176	382	4.03
Shannxi	57266	27.68	3	9.37	56.79	3.09	175955	10081	85.59
Gansu	28497	29.63	3.44	8.76	46.39	3.35	64514	5334	64.84
Qinghai	44047	28.72	3.08	8.12	53.07	3.36	27115	12996	29.42
Ningxia	50765	24.73	2.74	9.27	57.98	3.11	30735	4877	55.69
Xinjiang	44941	28.76	2.79	9.59	49.38	3.17	101291	9223	130.81
Table S2-17. The original data of the influencing factors that affect citizens’ health levels in 2018
The criteria layer	Economy			Society			Environment
The index layer	GDP per capita	Engel coefficient	Urban-rural income ratio	Average years of education	Urbanization rate	Family size	Wastewater discharge	Solid waste discharge	Exhaust emission
Unit	yuan	%	-	year	%	pearson	ten thousand tons	ten thousand tons	ten thousand tons
Beijing	140211	20.24	2.57	12.58	86.5	2.58	143983	608.88	17.19
Tianjin	120711	28.92	1.86	11.09	83.15	2.7	89520	1259.21	42.68
Hebei	47772	25.54	2.35	9.2	56.43	3.12	275391	32102.3	358.22
Shanxi	45328	24.9	2.64	9.87	58.41	2.99	110296	28521	221.36
Inner Mongolia	68302	27.07	2.78	9.74	62.71	2.62	101020	19865.3	196.39
Liaoning	58008	26.77	2.55	9.97	68.1	2.55	213625	21563.3	175.96
Jilin	55611	25.68	2.19	9.49	57.53	2.66	86392	4120.22	76.22
Heilongjiang	43274	26.91	2.11	9.57	60.1	2.59	132568	6789.59	125.98
Shanghai	134982	24.75	2.24	11.27	88.1	2.43	208747	1477.51	14.01
Jiangsu	115168	26.11	2.26	9.44	69.61	3.04	598632	10102.6	192.69
Zhejiang	98643	27.82	2.04	9.29	68.9	2.58	401563	4215.33	89.26
Anhui	47712	31.77	2.46	8.94	54.69	3.11	195632	9865.33	120.21
Fujian	91197	32.93	2.36	9.04	65.82	2.94	210369	4321.06	81.23
Jiangxi	47434	30.45	2.34	8.97	56.02	3.45	201963	11059.3	132.03
Shandong	76267	26.79	2.43	9.07	61.18	2.85	472361	20103.6	298.53
Henan	50152	26.11	2.3	9.03	51.71	3.41	367596	13896.2	162.38
Hubei	66616	28.11	2.3	9.59	60.3	3	241029	8102.81	109.88
Hunan	52949	27.97	2.6	9.41	56.02	3.29	278635	5984.33	128.12
Guangdong	86412	32.55	2.58	9.66	70.7	3.02	756833	5701.36	141.22
Guangxi	41489	30.44	2.61	8.79	50.22	3.4	180230	7018.99	81.02
Hainan	51955	37.38	2.38	9.85	59.06	3.59	42013	320.16	17.19
Chongqing	65933	32.32	2.53	9.3	65.5	2.9	182500	2015.26	81.29
Sichuan	48883	33.62	2.49	8.74	52.29	2.91	301500	10267.3	124.36
Guizhou	41244	27.49	3.25	8.17	47.52	3.26	95268	7102.95	121.03
Yunnan	37136	27.95	3.11	8.34	47.81	3.3	171020	10126	118.96
Tibet	43398	37.59	2.95	6.08	31.14	3.86	7176	382	4.03
Shannxi	63477	26.56	2.97	9.59	58.13	2.98	156324	8230.22	153.36
Gansu	31336	29.08	3.4	8.56	47.69	3.43	50196	5016.32	76.33
Qinghai	47689	28.21	3.03	8.4	54.47	3.25	21036	14695.2	38.39
Ningxia	54094	25.33	2.72	8.82	58.88	3.17	29863	3326.95	98.55
Xinjiang	49475	28.98	2.74	9.45	50.91	3.1	89263	8536.21	146.65
